# Supplementary material for: Adipocyte microRNA-802 promotes adipose tissue inflammation and insulin resistance by modulating macrophages in obesity
Source: eLife. 2024 Nov 26;13:e99162. doi: 10.7554/eLife.99162 (PMC11651656; doi:10.7554/eLife.99162)
Supplement: Source data 1. [file elife-99162-data1.xlsx]

## Sheet: Figure 1
A
	Leprdb/+	Leprdb/db 4 weeks	Leprdb/db 6 weeks	Leprdb/db 8 weeks	Leprdb/db 12 weeks	Leprdb/db 16 weeks
	0.93844	1.34638	1.9387	2.6738	3.6283	5.28178
	0.993788	1.45378	1.9738	2.66763	3.738	4.92638
	1.02839	1.28973	1.83768	2.72679	3.6783	4.73689
	0.97218	1.263	1.96217	2.57128	3.32	4.82
	0.9217	1.31278	1.86712	2.682	3.62	4.782
B	weeks	NCD						HFD
	0	0.9973	0.96723	0.983266	0.92718	0.982817		0.967	0.993678	0.9993	0.9982	1.01829
	4	0.9928	1.01928	0.99283	0.97128	1.0128		1.48329	1.63526	1.5327	1.2561	1.3781
	8	1.05178	1.16784	1.09818	0.9821	0.967		2.27389	2.173	2.18397	2.2198	2.63
	16	1.21988	1.11873	1.19876	1.012	0.92187		3.32567	3.12357	3.08289	3.219	3.39
	32	0.921	1.0128	0.9218	0.9812	0.9173		4.12568	4.45367	4.45267	4.34	4.51
C		NCD								HFD
	EpiWAT	0.98927	0.989838	0.921837	0.92877	1.02984	0.9973	0.95678		4.7821	4.92783	4.3687	4.34	4.6278	4.8237	4.233
	ScWAT	0.912873	0.921837	0.92876	0.98765	0.94367	1.09813	1.02198		2.3789	2.56378	2.17638	2.12783	2.56378	2.5367	2.34513
	BAT	0.96784	0.982938	0.936578	0.973789	1.01789	0.978388	0.978789		2.81399	2.9784	2.56679	2.5688	2.67899	2.9872	2.15798
		db/+								db/db
	EpiWAT	0.9289	0.97889	1.02198	1.09219	0.92873	0.998763	0.99873		5.2678	5.21674	4.9387	5.3789	5.3478	5.01298	4.91029
	ScWAT	1.02379	0.9973	0.976378	1.06738	1.02668	0.982379	0.95783		2.89173	2.5378	2.46718	2.6378	2.56264	2.65174	2.67218
	BAT	1.01788	1.07888	1.0998	0.989788	0.925768	0.967268	0.95212		2.1678	2.67789	2.17289	2.89263	2.1678	2.67782	2.6789
D
		NCD						HFD
	EpiWAT	361.52	359.287	356.279	376.2	367.2		763.32	752.29	736.732	775.4	754.3
	SVF	198.389	167.378	176.378	156.4	178.3		463.23	452.32	412.32	432.4	439.2
	Adipocyte	623.89	613.42	633.13	653.83	645.3		1325.47	1467.32	1471.24	1435.8	1396.2
							G					h
E				F				pcDNA 3.1	ADA--FoxO1	si NC	si-FoxO1		pcDNA 3.1	ADA--FoxO1	si NC	si-FoxO1
	Control	IR			Control	IR		8.839	54.8923	8.983	1.1901		1.02337	16.1113	1.02337	0.289172
	1	2.79594			1	2.543		9.128	55.284	9.328	0.9839		1.02337	14.9285	1.06683	0.279322
	0.98851	3.59479			0.9853	2.398		9.72	54.29	8.638	1.0128		0.954842	14.2215	0.915945	0.258816
	0.9887	3.5217			0.97378	2.372
I										J
0 weeks	2 weeks	4 weeks	6 weeks	8 weeks	16 weeks	24 weeks				0 weeks	2 weeks	4 weeks	6 weeks	8 weeks	16 weeks	24 weeks		0	2	4	6	8	16	24
1.41	2.99	3.01	5.29	15.3	22	34.6				0	0	0	2	2	5	12		47.493	53.792	78.4252	79.5886	107.653	156.145	160.768
1.49	3.62	3.12	4.62	13.2	22.5	35.8				0	0	0	1	3	6	13		39.349	53.792	68.5504	83.7334	102.551	168.816	207.762
1.32	2.32	3.59	4.37	15.2	23.4	36.4				0	0	0	0	3	7	12		40.42	51.515	68.5504	83.2833	99.1504	141.289	168.553
1.28	2.36	3.67	5.23	14.3	22.4	34.9				0	0	0	1	3	5	14		42.485	62.021	65.818	100.268	125.321	164.312	153.819
1.19	2.53	3.28	4.83	14.8	23.6	33.7				0	0	0	0	3	7	13		47.238	49.495	56.626	89.4054	90.779	159.807	204.374
K				L				M
	Normal	Obesity & IR			BMI	Mir802			HOMA-IR	Mir802
	1.1	15.8314			54	15.8314			7.76414	15.8314
	1.26	17.0604			53.35	17.0604			10.3588	17.0604
	1.32	17.0379			50.17	17.0379			8.50268	17.0379
	1.48	18.705			49	18.705			7.76317	18.705
	1.21	15.0659			48.5	15.0659			7.08308	15.0659
	1.22	14.9393			48.44	14.9393			7.0151	14.9393
	1.18	14.7022			48	14.7022			6.93348	14.7022
	1.07	12.019			47.75	12.019			6.56361	12.019
	1	10.5436			46.88	10.5436			6.37867	10.5436
	0.98	10.4941			46.65	10.4941			5.78428	10.4941
	0.92	9.84746			46	9.84746			5.38129	9.84746
	0.88	9.57283			44.9	9.57283			5.01698	9.57283
	0.96	8.91953			44.6	8.91953			5.01168	8.91953
	0.75	8.88306			44.4	8.88306			4.99578	8.88306
	0.86	8.8795			44.14	8.8795			4.95188	8.8795
	0.9728	8.30815			43.83	8.30815			4.9466	8.30815
	1.08927	8.29027			43	8.29027			4.94133	8.29027
	1.1873	7.8715			42	7.8715			4.91866	7.8715
	1.23749	7.60297			41	7.60297			4.8002	7.60297
	1.13278	7.2704			40.8	7.2704			4.71205	7.2704
	0.9872	7.19883			40.49	7.19883			4.71205	7.19883
	1.1782	6.8117			39.2	6.8117			4.68951	6.8117
	1.08913	6.4939			38.97	6.4939			4.53258	6.4939
	0.9827	6.45789			38	6.45789			4.26593	6.45789
	1.0872	6.34785			38	6.34785			4.26593	6.34785
		5.87777			38	5.87777			4.18145	5.87777
		5.35652			38	5.35652			4.13174	5.35652
		5.29426			37.87	5.29426			4.0412	5.29426
		5.1714			37.65	5.1714			3.93398	5.1714
		5.06745			37.46	5.06745			3.88847	5.06745
		4.74694			37	4.74694			3.88847	4.74694
		4.49599			36.65	4.49599			3.8268	4.49599
		4.37523			36.5	4.37523			3.76605	4.37523
		4.16773			36.44	4.16773			3.68374	4.16773
		4.06399			36.4	4.06399			3.68066	4.06399
		3.59719			36.2	3.59719			3.68066	3.59719
		3.57632			36	3.57632			3.61902	3.57632
		3.55119			35.92	3.55119			3.4103	3.55119
		3.5089			35.9	3.5089			3.37155	3.5089
		3.48485			35.5	3.48485			3.33367	3.48485
		3.24397			35.5	3.24397			3.2579	3.24397
		2.94745			35.43	2.94745			3.13308	2.94745
		2.67111			35.4	2.67111			3.13308	2.67111
		2.64713			35.32	2.64713			2.93525	2.64713
		2.3085			35.29	2.3085			2.85513	2.3085
		2.01583			35.2	2.01583			2.82187	2.01583
		5.96604			35.11	5.96604			2.62062	5.96604
		7.94242			34.95	7.94242			2.59215	7.94242
		8.84491			34.6	8.84491			2.58514	8.84491
		8.76028			34.38	8.76028			2.35241	8.76028
		6.71613			34.38	6.71613			2.35017	6.71613
		11.7068			34.34	11.7068			2.27895	11.7068
		6.5599			34	6.5599			2.18993	6.5599
		7.36078			34	7.36078			2.18696	7.36078
		5.28338			33.9	5.28338			2.18398	5.28338
		4.1021			33.8	4.1021			1.94783	4.1021
		5.01475			33.79	5.01475			1.93013	5.01475
		6.88133			33.52	6.88133			1.93013	6.88133
		7.8127			33.2	7.8127			1.87142	7.8127
		6.77759			33.06	6.77759			1.65725	6.77759
		6.72171			32.85	6.72171			1.62629	6.72171
		7.55962			32.63	7.55962			1.53432	7.55962
		4.55289			32.39	4.55289			1.48444	4.55289
		2.5013			32	2.5013			1.37732	2.5013
		2.47969			32	2.47969			1.32729	2.47969
		7.44246			31.6	7.44246			1.21926	7.44246
		3.14387			33.1387	3.14387			1.04784	3.14387
		11.0936			30.8	11.0936			1.00974	11.0936
		2.02773			30.8	2.02773			2.00974	2.02773
		2.33			30.27	2.33			3.9856	2.33
					20.3	0.75			0.13184	0.75
					20.8	0.98			0.13528	0.98
					20.9	0.92			0.1484	0.92
					20.9	0.88			0.150222	0.88
					21.3	0.96			0.150267	0.96
					21.3	0.9827			0.174933	0.9827
					21.3	1.0872			0.179449	1.0872
					21.3	1.18			0.184427	1.18
					21.4	1.07			0.195511	1.07
					21.6	1			0.195653	1
					21.6	1.1			0.196747	1.1
					21.7	1.08913			0.1972	1.08913
					21.8	1.1782			0.200764	1.1782
					21.8	0.86			0.202533	0.86
					22.3	0.9728			0.20304	0.9728
					22.3	1.08927			0.213422	1.08927
					22.3	1.1873			0.216529	1.1873
					22.5	1.23749			0.22072	1.23749
					22.8	1.13278			0.222293	1.13278
					23.2	0.9872			0.235613	0.9872
					23.4	1.21			0.24768	1.21
					23.4	1.22			0.256356	1.22
					23.5	1.21			0.277707	1.21
					24.2	1.22			0.291271	1.22
					24.3	1.48			0.423049	1.48

## Sheet: Figure 1- figure supplement 1
A
	Leprdb/+	Leprdb/db 4 weeks	Leprdb/db 6 weeks	Leprdb/db 8 weeks	Leprdb/db 12 weeks	Leprdb/db 16 weeks
	0.9948	1.3892	1.83629	2.23897	3.23268	4.7823
	1.034	1.43567	1.83783	2.34562	3.25378	4.328
	0.9832	1.27838	1.78139	2.5136	3.18379	4.82639
	0.98	1.217	1.978	2.473	3.29	4.73
	0.9216	1.25	1.8216	2.42	3.49	4.53
B
	weeks	NCD						HFD
	0	0.95673	0.91526	0.9572	0.929	1.019		0.91873	0.956457	1.09873	0.99812	1.09
	4	0.912897	1.01238	0.919287	0.9378	0.972		1.9738	1.6712	1.6728	1.72	1.927
	8	1.01984	1.01909	1.13879	1.012	0.965		2.56714	2.91874	2.19873	2.31	2.67
	16	1.01	0.98	1.01987	0.983	1.01982		3.01987	2.91874	3.17856	3.0928	3.27
	32	0.987	1.012	0.97	1.1	0.928		4.90814	4.67189	4.36789	4.83	4.97
C				D
	Control	IR			Control	IR
	0.947923	3.3279			0.9238	2.67489
	0.997369	3.93268			1.03278	2.7324
	1.03897	3.91733			1.09329	2.82378
F
	Normal	obesity&IR
	1.1	4.57123
	1.26	4.13826
	1.32	3.3026
	1.48	20.7927
	1.21	7.9163
	1.22	5.85625
	1.18	17.9823
	1.07	20.813
	1	5.50306
	0.98	13.0726
	0.92	15.5587
	0.88	19.5779
	0.96	6.08805
	0.75	8.53626
	0.86	7.48134
	0.97834	10.9419
	0.878384	13.8148
	0.8637	11.6174
	1.02173	20.6855
	1.12346	18.4828
	0.983274	13.3159
	0.9637	18.2931
	1.37892	18.8637
	0.983764	2.91689
	0.921894	11.075
		4.30741
		21.3423
		23.1459
		10.9017
		12.3052
		4.89667
		13.1836
		8.97837
		9.9872
		8.665
		9.537
		13.58
		14.38
		16.89
		12.44
		9.98
		10.92
		11.34
		15.3893
		12.895
		11.748
		13.3189
		14.839
		11.8913
		7.21538
		5.2183
		3.21839
		11.328
		12.84
		14.2178
		11.9939
		13.8738
		7.6318
		5.689
		6.32889
		4.3782
		8.383
		7.26389
		6.21984
		7.28137
		9.21387
		6.3284
		7.21784
		12.389
		14.3783

## Sheet: Figure 2
A
		0 weeks							0 weeks
	KI-control	0	0	0	0	0		KI-control	27.9766	39.9371	43.6234	44.6678	44.6678
	miR-802 KI	0	0	0	0	0		miR-802 KI	38.3497	40.7992	37.8991	35.1137	43.3329
		8 weeks							8 weeks
	KI-control	2.3	2.5	2.1	2.5	2.6		KI-control	115.408	107.948	113.206	115.271	110.424
	miR-802 KI	6.4	6.5	7.4	6.8	7.8		miR-802 KI	132.501	139.571	137.12	122.135	157.672
		16 weeks							16 weeks
	KI-control	4.5	4.6	4.2	4.7	4.1		KI-control	149.998	144.064	129.733	151.537	141.29
	miR-802 KI	13.5	12.9	11.7	10.9	10.4		miR-802 KI	211.02	205.39	199.759	198.71	168.449
B	weeks	KI-control						Mir802 KI
	8	15.2	14.4	14.2	15.2	15.9		22.4	23	21.2	22.9	20.8
	16	25.1	25.8	25.8	26.3	26.9		43.5	43.9	42.6	45.5	40.3
	24	32.9	32.3	34.2	33.9	35.2		61.9	61.8	60.6	62.8	58.3
C
	weeks	KI-control						Mir802 KI
	8	12.3	13.3	13.7	2.9	12.3		22.9	21.7	20.9	22.3	21.8
	16	26	29.2	27.8	28.3	29.3		55.8	54.3	56.4	54.3	53.4
	24	40.6	42	43	44.3	42.8		71.4	73.2	69.4	72.3	68.9
	8	34.7	33.9	35.6	34.3	34.8		24.7	24.4	23.9	24.5	25.3
	16	30.4	21.8	23.4	24.3	22.3		13.2	14.3	15.3	14.3	13.9
	24	22.7	20.3	19.2	18.2	19.2		8.15	8.39	9.23	7.87	7.93
D
		KI-control						Mir802 KI
	Tnfα	0.982274	0.937141	0.995655	1.01721	0.998146		3.36205	3.35696	3.27612	3.37216	3.83066
	Il-6	0.985991	1.09098	0.986223	0.982061	0.982274		3.12242	3.13246	3.35696	3.36197	3.35097
	Il-1β	1.0894	0.985622	1.01811	0.985652	0.985657		4.36474	4.36024	4.22967	4.3193	4.32014
	Inos	0.92713	0.981998	0.996573	0.995575	0.93508		2.12416	2.135	2.8672	2.18352	2.71694
	Ccl2	0.985592	1.03161	0.980601	0.93508	0.981898		3.21313	3.21173	3.13246	3.12243	3.82038
	Ifn-γ	0.981299	0.978305	0.996273	1.08183	1.05417		4.31253	4.66192	4.30254	3.97311	4.31253
	Fizz1	0.992061	1.01454	0.985891	1.01811	0.997032		0.356083	0.236169	0.34508	0.286868	0.235292
	Ym1	0.937076	0.985592	0.910802	0.931262	0.985657		0.341975	0.345072	0.232165	0.345002	0.234094
	Arg1	0.985292	0.985891	0.961903	1.01587	1.01811		0.29233	0.367164	0.235262	0.367164	0.356382
	Il-10	0.981569	1.01811	0.907158	1.08183	0.985652		0.367202	0.415979	0.351029	0.411886	0.386929
E
	weeks	KI-control						Mir802 KI
	0	187.685	187.685	180.584	164.017	170.881		173.721	180.584	180.584	180.584	190.052
	8	333.336	336.103	326.878	339.178	336.103		424.972	406.829	412.672	437.58	406.214
	16	527.456	544.115	510.796	530.788	544.115		647.741	660.735	667.399	632.413	644.075
	30	860.798	853.019	845.239	856.908	841.349		1023.39	1043.62	1081.73	1090.29	1094.18
F	weeks	KI-control						miR-802 KI
	0	74.1931	73.4727	78.515	88.5995	80.676		80.676	80.676	73.4727	66.9899	74.1931
	8	176.066	171.446	177.606	196.598	201.731		310.04	324.926	324.413	330.572	324.926
	16	389.44	346.266	393.801	385.079	376.357		493.668	528.557	520.271	507.188	528.557
	30	852.319	852.319	828.528	846.371	828.528		969.49	1001.01	1012.91	1029.56	1030.16
G
	weeks	KI-control						Mir802 KI
	0	95.0824	112.987	100.639	112.37	100.022		100.022	107.431	112.987	106.813	101.874
	8	189.424	200.126	201.731	204.942	209.757		317.312	301.794	290.557	269.688	306.61
	16	476.296	445.485	451.262	464.1	445.485		579.644	637.416	656.031	618.158	624.577
	30	864.848	797.961	811.339	851.471	878.226		1139.09	1225.37	1172.53	1132.4	1158.48
H
	weeks	KI-control						Mir802 KI
	0	88.2496	81.0052	78.3709	88.2496	86.9325		81.6638	88.2496	78.3709	88.2496	83.6396
	8	186.934	192.676	180.554	186.934	193.952		302.411	315.171	269.873	296.031	320.275
	16	345.593	396.24	393.261	367.937	396.985		544.457	553.395	583.933	530.306	545.947
	30	776.774	698.67	740.562	747.662	690.86		996.883	1025.28	989.783	1067.18	1052.98
I
	weeks	KI-control								Mir802 KI
	0	21.6	20.6	21.6	20.6	21.6	23.4	21.6		23.7	22.7	23.7	23.7	23.7	21.7	22.7
	2	25.3	25.3	25.3	24.4	24.4	26.3	24.4		25.7	25.7	25.7	24	23	24.7	24.7
	4	27.2	27.2	26.3	25.3	25.3	27.2	26.3		28.5	29.4	28.5	27.2	28.5	28.2	27.5
	6	28.1	29.1	27.2	27.2	26.3	27.2	30		29	32.9	28.9	29.6	29	31.9	29.6
	8	30	30.9	30	29.1	27.2	29.1	31.9		31.1	32.5	32	30.3	33.8	30.3	28.6
	10	31.9	33.8	30.9	30.9	29.1	30	33.8		32.8	34.2	33.7	32	35.5	32	30.3
	12	32.8	34.7	31.9	32.8	31.9	31.9	37.5		36.9	36	36	36	35.2	35.2	36
	14	33.8	36.6	33.8	33.8	31.9	33.8	39.4		38.9	38.9	38.1	38.1	38.1	40.6	39.7
	16	37.5	41.3	37.5	36.6	33.8	36.6	42.2		40.2	41	41.9	41	40.2	44.4	42.7
	18	38.5	44.1	38.5	38.5	42.2	40.3	47.8		46.9	45.2	43.6	41.9	41.9	44.4	45.2
	20	40.3	45	42.2	43.1	41.3	42.2	47.8		48.9	48.1	46.4	44.8	47.3	47.3	47.3
	22	44.1	47.8	44.1	45	43.1	44.1	49.7		50.1	50.1	47.6	45.9	48.4	49.2	48.4
	24	45	47.8	46	45	45	46	50.6		52.7	51.9	50.2	49.4	51.1	50.9	50
	26	46.3	48.3	49.3	46.3	46.8	47.3	50.3		55.8	54.7	53.8	52.7	54.1	53.5	52.4
	28	47.3	49.3	51.4	47.3	47.3	47.9	50.8		57.5	56.6	55.6	53.9	55.4	54.7	54.3
	30	49.3	50.9	51.3	48.1	48.3	48.3	51.3		57.8	57.6	55.8	54.2	55.9	54.9	55.3
J
	weeks	KI-control								Mir802 KI
	0	6.2	6.7	5.5	6.5	6.6	6.3	6.5		6.7	6.4	5.7	6.2	6.4	6.2	6.8
	2	5.9	6.1	6.4	7.1	5.7	6.1	6.5		7.1	5.9	6.3	6.6	6.2	7.1	6.6
	4	6.7	6.1	5.3	6.1	6.6	6.1	6.9		6.3	6.8	6.3	6.6	6.3	6.8	6.4
	6	6.5	6.3	6.1	6.1	7.1	6.3	6.6		6.7	6.4	6.7	6.2	6.3	7.4	6.8
	8	6.5	6.6	7.5	6.9	6.5	6.5	6.7		6.1	6.4	6	7	6.5	6.7	6.9
	10	6.7	7.5	6.6	7.4	6.2	6.7	6.6		7.4	7.4	7.3	6.3	6.7	8.3	6.8
	12	6	6.3	6.5	7.6	6.5	7.6	5.9		6.9	7	7.4	6.8	7.6	7.4	6.8
	14	6.6	7	7.2	6.6	7.2	6.6	6.9		7.1	7.4	7.6	6.7	6.4	7.3	6.4
	16	6.8	6.6	6.7	6.5	7.7	6.9	7.2		7.2	6.2	7.8	6.4	8.2	7.3	8.1
	18	6.8	7.1	7.1	7	6.3	7.7	6.3		7.3	6.2	5.3	7.3	8.1	7.7	8.5
	20	6.8	6.2	8.9	6.6	7.1	6.6	7.5		8.7	6.8	7.7	6.9	7.2	6.9	7.2
	22	6.6	5.9	7.2	7.9	7.5	8.1	7.6		7.3	8.3	7.7	7.5	7.3	8.1	7.1
	24	8.3	7.5	7.5	7.1	6.6	7.5	7.7		8.6	6.9	7.3	7.6	8.8	7.3	7.8
	26	8.8	6.5	6.4	7.5	7.3	7.8	6.9		9.3	8.2	7.6	7.6	8.9	10.2	9.2
	28	9.3	7.4	7.6	8.2	6.8	7.1	7.3		9.5	8.4	9.5	7.5	9.4	8.7	8.3
	30	7.3	7.7	6.3	8.9	7.8	7.4	7.8		9.3	8.9	7.8	8.3	10.2	11.2	9.1
K				L
	KI-control	Mir802 KI				KI-control								Mir802 KI
	12.63	15.42			EpiWAT	2.93	3.03	2.93	3.12	2.83	2.93	3.12		4.31	3.92	4.01	3.82	4.12	3.93	3.99
	12.73	14.73			RpWAT	1.12	1.24	1.34	1.27	1.19	1.21	1.23		1.59	1.62	1.56	1.62	1.49	1.52	1.62
	11.72	15.32			BAT	0.33	0.36	0.41	0.38	0.42	0.39	0.43		0.31	0.41	0.32	0.39	0.32	0.36	0.35
	11.83	14.57
	12.44	16.32
	12.52	16.21		M
	11.53	15.32				KI-control						Mir802 KI
					visceral	5984	6129	5792	6423	5793		6983	7037	7323	7373	7362
					Subcutaneous	7937	8356	7847	8036	7973		7923	8234	8362	7994	8342
N
	weeks	KI-control						Mir802 KI
	0	1588	1476	1458	975.6	1852		1625	1629	1449	1640	1910
	4	1333	1289	1466	930.9	1238		1671	1496	1453	1683	1335
	8	1418	1419	1503	1152	1360		1862	1644	1817	2053	1678
	16	1523	1643	1511	1373	1458		1967	2130	1891	2031	2155
	30	1703	1547	1620	1313	1382		1895	2071	2107	2144	1825
O
	weeks	KI-control							Mir802 KI
	0	159.8	268.5	321.8	327	401.3			237	250.8	362.3	164.3	217.5
	4	219.8	392.3	353.3	287.3	182.5			243.8	140.8	255	182.7	208.8
	8	162.5	185.2	158.3	157.4	164			94.65	123.8	70.08	99.79	95.25
	16	145.5	171.8	160.5	191.3	213			106.5	83.25	70.69	91.09	87
	30	154.5	195	156	210.8	174			64.5	112.5	78.75	102.8	80.25
P
	weeks	KI-control								Mir802 KI
	0	0.28	0.31	0.29	0.33	0.35	0.38	0.41		0.34	0.38	0.41	0.37	0.39	0.42	0.45
	4	0.67	0.69	0.53	0.63	0.71	0.87	0.59		0.78	0.69	0.98	0.81	0.78	0.83	0.92
	8	2.09	1.98	1.89	2.12	1.79	2.21	1.98		2.43	2.78	2.93	2.61	2.58	2.68	2.87
	16	3.89	3.98	4.21	3.78	3.69	4.02	4.12		4.98	4.87	5.1	4.88	4.79	4.68	4.98
	30	4.78	4.67	4.65	5.21	4.98	5.03	4.78		5.67	5.59	5.98	6.12	5.98	5.78	6.01
Q
	weeks	KI-control								Mir802 KI
	0	2.28	2.31	1.32	2.13	1.98	1.38	2.31		2.32	2.42	3.23	1.38	2.13	1.78	2.13
	4	5.67	4.53	5.32	4.24	4.93	5.38	5.83		6.43	6.53	7.34	5.99	6.34	6.85	7.34
	8	8.32	8.23	7.83	7.38	6.89	7.32	8.32		10.34	10.98	9.38	10.21	11.32	9.98	11.23
	16	10.28	11.23	9.31	11.92	12.31	11.73	12.31		15.42	14.98	14.32	15.12	14.32	15.42	13.99
	30	14.39	15.24	14.39	14.13	14.28	15.13	14.17		18.93	19.39	19.26	18.64	17.36	19.84	19.64

## Sheet: Figure 2- figure supplement 1
C
		KI-control				Mir802 KI
	EpiWAT	0.997104	0.996665	1.01122		153.478	149.326	158.33
	ScWAT	0.980102	1.01804	0.944139		121.239	124.329	119.823
	BAT	0.985773	0.997104	0.996056		87.7328	82.498	79.648
	Liver	0.937172	0.937172	0.997152		0.972655	0.956535	0.92098
	Muscle	1.01817	1.09041	0.996176		0.962916	0.961524	0.972305
	Pancreas	0.927218	1.08951	1.09005		0.971262	0.970715	0.967727
	Heart	0.995677	0.996006	1.01821		0.961845	0.972687	0.971262
D
		KI-control				Mir802 KI
	Adipocyte	0.98	1.023	0.92378		163.4	153.93	160.83
	SVF	0.92398	1.01389	0.937		1.11329	1.01293	1.2839
E					F
	weeks	NCD-control	NCD-Mir802 KI			weeks	NCD-control							NCD-Mir802 KI
	0	0	0			0	21.2	22.3	23.1	22.3	22.1	20.9	21.2	22.2	23.2	21.6	21.3	22.1	20.7	21.2
	1	16.3	16.8			2	21.8	22.1	23.2	22.4	22.6	21.4	22.3	22.7	23.2	23.3	21.4	22.4	21.3	22.3
	2	38.5	40.2			4	22.3	22.6	23.5	23.4	23.1	22.2	22.6	22.9	23.2	23.6	22.6	23.2	22.1	23.4
	3	63.6	67.6			6	23.3	23.4	22.4	24.2	24.3	22.6	23.4	23.7	24.3	24.6	23.6	24.3	24.3	24.7
	4	86.8	89.3			8	24.3	25.2	24.3	25.3	25.7	23.5	25.4	24.3	25.3	25.1	25.2	25.3	25.7	25.4
	5	110	115.8			10	25.3	26.3	25.3	26.3	26.3	24.3	26.3	26.3	25.9	26.3	26.3	26.9	26.2	26.3
	6	134.6	135.2			12	27.3	27.3	25.9	25.3	27.2	25.3	26.9	27.3	26.2	27.2	27.9	27.3	27.2	26.3
	7	162.6	159.5			14	27.7	27.3	26.9	27.3	27.3	25.8	26.2	27.3	27.2	27.8	28.3	27.7	27.3	26.3
	8	192.8	195			16	27.9	27	27.3	28.3	27.9	26.3	26.8	27.3	27.9	27.3	28.3	27.3	28.3	29.3
	9	219.3	222.5			18	26.3	27.3	27.9	28.1	28.3	27.2	26.9	27.3	27.9	27.3	28.3	29.3	29.3	30.2
	10	237.2	239			20	27.3	28.3	28.3	28.3	28.9	27.3	28.3	28.9	29.3	28.2	28.3	30.3	30.9	30.2
	11	255	265			22	27.3	28.8	28.3	28.9	27.9	29.3	29.3	31.3	32.3	30.4	30.8	30.2	28.3	30.2
	12	266.5	269			24	27.7	28.8	28.7	29.3	28.3	28.3	29.8	32.3	31	31.3	30.7	29.3	31.3	30.3
	13	274	276			26	28.3	28.3	28.9	29.8	29.3	29.4	30.3	32.3	31.3	32.4	30.4	29.4	30.9	30.4
	14	280.5	283			28	28.7	28.8	29.2	30.3	30.2	30.3	30.7	33.4	32.5	30.9	31.3	29.6	32.3	30.8
	15	299.72	302.27			30	29.2	29.8	29.3	31.3	31.8	30.4	30.8	33.2	33.4	31.3	34.3	33.4	32.3	30.1
	16	318.53	321.44
	17	337.34	340.6		G
	18	356.15	359.77				NCD-control							NCD-Mir802 KI
	19	374.96	378.94			0	6.3	6.5	6.5	7.3	7.1	5.7	5.3	6.4	5.8	6.4	6.4	7.4	6.4	6.4
	20	393.78	398.11			2	6.4	6.4	6.5	6.9	7.4	5.9	6.4	6.5	6.4	6.9	6.2	5.9	7.4	6.3
	21	412.59	417.28			4	6.4	7.3	6.9	6.4	7.4	5.6	6.4	6.4	6.4	6.8	6.1	7.5	6	7.2
	22	431.4	436.44			6	7.3	6.9	6.7	5.9	7.3	5.9	6.5	6.9	6.6	6.5	6.3	6.4	6.4	7.3
	23	450.21	455.61			8	6.9	5.9	6.4	6.6	7.3	5.8	6.3	6.4	6.8	7.5	7.3	5.9	5.4	6.9
	24	469.02	474.78			10	6.3	6.4	6.9	6.6	6.9	7.2	5.9	6.1	5.6	7.3	6.9	6.3	6.1	6.9
	25	487.84	493.95			12	6.3	5.7	5	7.4	6.4	6.4	7.3	6.3	6.4	6.4	7.4	7.3	5.7	6.5
	26	506.65	513.12			14	5.7	5.4	6.7	6.1	7.3	7.6	6.7	6.7	7.5	7.6	6.8	7.5	5.4	6.1
	27	525.46	532.28			16	6.3	7.4	5.6	6.4	6.3	7.5	6.7	6.5	7.4	6.3	7.5	6.5	5.4	6.3
	28	544.27	551.45			18	6.4	6.4	6.3	6.4	6.3	7.3	5.9	6.5	6.5	7.2	6.3	7.5	6.9	7.5
	29	563.08	570.62			20	6.3	6.3	6.4	6.3	7.2	5.6	6.2	6.6	6.5	6.5	6.7	7.3	6.5	6.9
	30	581.9	589.79			22	7.4	6.8	5.9	6.4	6.1	6.2	6.4	6.7	6.7	6.9	6.3	7.5	7.5	6.5
						24	6.3	7.4	6.4	6.5	5.9	6.4	6.6	7.2	6.6	6.4	6.9	6.5	7.3	6.9
						26	6.3	6.2	6.5	6.9	6.2	6.7	6.5	6.8	6.7	7.5	7.1	6.1	7.3	7.5
						28	7.3	6.1	6.7	6.9	6.3	6.7	6.8	6.5	7.3	6.3	6.9	6.9	7.1	6.5
						30	6.1	7.2	7.1	6.9	7.3	6.4	6.5	7.4	7.3	6.4	7.3	6.9	7.1	6.9
			I
H					0 weeks					8 weeks					16 weeks
	NCD-control	NCD-Mir802 KI		KI-control	25.1789	35.9434	36.479	32.8055	44.1525	67.5159	57.7365	67.5994	62.5881	63.0489	77.368	74.6971	84.8154	68.6444	73.937
	3.92	4.42		Mir802 KI	39.6403	40.2292	33.1431	42.4344	42.4344	59.502	61.9718	63.7354	61.6473	63.671	65.5719	79.9245	84.348	85.6014	68.0243
	4.32	4.32
	4.21	4.72
	3.82	4.1
	4.32	3.79
	4.52	3.92
	4.21	4.12

## Sheet: Figure 2- figure supplement 2
B													C
	time	KI-control						Mir802 KI						time	KI-control						Mir802 KI
	0	7.2	6.3	5.3	8.3	5.1		5.8	4.9	8.7	5.4	4.2		0	7.8	6.9	5.3	7.4	6.3		5.8	5.4	7.5	6.4	7.3
	15	33.3	26.8	26.3	26.1	28.1		29.3	31.9	32.4	28.3	31.1		15	30.4	31.4	28.4	29.4	29.3		33.3	31.9	32.4	29.3	31.1
	30	33.3	24.5	24.3	22.4	25.8		25.3	23.3	33.3	25.7	33.3		30	29.3	26.3	20.3	18.3	20.3		30.2	25.2	25.4	30.2	25.3
	60	15.8	18.7	18	17.4	22.8		23.6	20.7	19.7	19.7	18.6		60	17.2	16.4	18.3	16.4	18.2		20.3	19.2	21.3	20.3	19.2
	90	16.9	16.4	15.1	12.6	18.4		13.8	14.7	14.8	17.4	15.3		90	14.2	12.4	17.3	10.3	11.2		13.2	11.9	15.3	18.3	12.5
	120	11.2	11.9	8	6.9	12.5		9.8	7.7	10.5	8.8	10		120	10.2	9.2	7.4	7.3	11.2		9.3	8.3	9.4	8.4	11.3
D
	time	KI-control						Mir802 KI
	0	7.3	6.9	6.3	8.6	7.6		7.5	7.4	6.9	6.3	6.9
	15	28.6	26.8	26.3	26.1	28.1		30.1	29.5	29.8	30.2	31.1
	30	30.2	29.5	28.9	26.4	27.3		33.2	31.2	33.3	30.2	29.4
	60	18.3	17.4	18.9	19.3	20.4		28.6	23.4	25.9	28.3	26.5
	90	13.2	14.3	15.3	14.5	13.7		15.4	16.3	15.8	19.3	12.8
	120	12.4	11.9	9.4	7.8	10.4		12.5	9.4	9.7	13.4	9.8
E
	time	KI-control						Mir802 KI
	0	8.9	7.6	8.3	8.3	7.1		8.3	7.8	8.9	7.4	6.8
	15	26.9	28.7	30.4	29.4	29.3		30.3	32.3	30.4	33.2	34.2
	30	27.7	32.3	30.2	31.4	28.7		34.3	33.8	32.8	33.4	33.7
	60	28.3	27.3	26.3	23.2	20.3		28.9	30.2	29.3	29.3	30.1
	90	16.9	12.3	13.2	11.5	14.3		20.3	21.3	22.4	20.3	19.8
	120	9.4	10.2	8.3	7.6	8.9		13.2	14.5	9.8	8.4	10.1
F
	time	KI-control						Mir802 KI
	0	8.4	7.5	6.9	7.5	7.5		8.4	8.2	7.7	6.9	8.1
	15	29.3	28.3	27.3	25.4	28.3		31.3	32.4	33.9	29.3	33.2
	30	30.2	29.3	28.3	27.3	27.6		32.3	34.5	33.8	33.9	34.6
	60	27.4	22.3	21.4	19.3	20.9		28.3	27.8	27.8	29.3	24.7
	90	17.4	15.8	18.7	15.3	13.3		20.3	23.2	22.3	20.3	17.8
	120	12.3	10.9	9.8	8.2	10.3		12.4	13.4	13.4	15.3	12.3
G
	time	KI-control							Mir802 KI
	0	5.3	5.8	6.6	6.1	6.8			5.7	6.3	6.7	5.2	5.3
	15	3.9	3.1	3.4	4.9	4.3			3.2	3.9	5.1	3.3	5.4
	30	3.4	2.2	3.3	2.3	2.9			3.3	2.6	2.4	3.8	2.4
	60	2.1	2.2	2.9	2.1	2.3			2.4	2.8	2.9	2.1	2.8
	90	5.3	4.7	4.5	3.6	3.3			4.5	5.2	3.5	4.7	3.4
	120	6.4	5.4	4.9	4.2	4.4			5	7	4.6	5.7	3.9
H
	Time	KI-control							Mir802 KI
	0	7.5	8.2	8.3	7.2	6.2			7.2	6.4	7.2	6.9	6.5
	15	5.5	4.4	4.8	6.9	4.8			4.5	5.5	7.2	4.7	7.7
	30	4.8	3.1	4.6	3.3	4.2			4.7	3.6	3.4	5.5	3.4
	60	3.2	3.4	4.2	3.2	3.5			3.6	3.9	4.1	3.2	3.9
	90	7.5	6.6	6.4	5.1	4.7			6.4	7.4	4.9	6.6	4.9
	120	8.5	6.3	5.8	6.4	7.3			6.2	6.3	6.7	7.1	5.2
I
	time	KI-control							Mir802 KI
	0	6.7	7.1	6.7	6.5	6.7			6.9	8.6	7.6	7.8	7.8
	15	5.8	5.8	5.5	5.4	5.6			6.3	8.5	7.5	7.6	7.8
	30	3.3	3.5	3.1	4.1	3.5			5.9	6.7	6.3	6.8	5.9
	60	4.4	4.4	5.3	4.7	4.6			5.8	6.5	6.7	6.2	6.9
	90	6.9	7.2	6.9	7.3	6.9			7.8	8.4	7.5	6.9	7.2
	120	6.9	6.7	7.8	8.2	7.5			8.1	7.9	8.4	8.6	7.3
J
	time	KI-control					Mir802 KI
	0	7.8	8.2	7.8	8.4	8.4	8.6	8.1	7.9	8.4	8.1
	15	6.8	6.9	7.4	7.4	7.5	8.1	7.6	7.6	8.1	7.7
	30	6.8	6.5	6.4	6.3	6.4	7.6	7.2	7.3	7.8	7.3
	60	5.4	5.6	4.6	5.3	5.2	6.7	6.6	6.4	6.8	7
	90	6.9	7.2	6.9	7.3	6.9	8.2	8.4	8	7.5	7.5
	120	7.2	7.8	7.8	8.2	7.5	8.1	8.7	8.4	8.6	7.3
K
	time	KI-control					Mir802 KI
	0	8.9	9.1	8.8	9.3	8.9	9.3	10.2	8.9	9.2	9.1
	15	7.6	7.8	8.1	8.2	7.9	9.2	10.1	8.4	9.1	9
	30	7.3	6.9	6.6	7.6	7.3	8.9	8.6	8.2	8.5	8.4
	60	6.8	6.7	7.1	6.8	6.3	8.2	8.9	7.6	7.4	7.8
	90	7.7	7.3	7.6	7.3	7.4	8.6	9.1	8.3	8.4	8.6
	120	8.9	9.1	8.2	7.9	8.9	9.3	10	9.1	8.7	8.5

## Sheet: Figure 3
A
	time	KO-control							Mir802 KO
	0	21	20.5	21.5	20.5	21.5	23.3	21.5	23	22	23	23	23	21	22
	2	22	25.2	25.2	24.3	24.3	26.2	24.3	24.9	24.9	24.9	23.3	22.3	24	24
	4	26.1	27.1	26.2	25.2	25.2	27.1	26.2	27.6	28.5	27.6	26.4	27.6	27.3	26.7
	6	28.4	29	27.1	27.1	26.2	27.1	29.9	28.1	31.9	28	28.7	28.1	30.9	28.7
	8	29.1	30.8	29.9	29	27.1	29	31.8	30.2	31.5	31	29.4	32.8	29.4	27.7
	10	30.2	33.7	30.8	30.8	29	29.9	33.7	31.8	32.2	32.7	31	32.4	31	29.4
	12	32.2	34.6	31.8	32.7	31.8	31.8	37.4	30.5	32.7	33.7	31.7	32.1	30.1	29.7
	14	34.2	36.5	33.7	33.7	31.8	33.7	39.3	32.1	32.1	31.5	31.5	31.5	33.5	32.8
	16	37.1	41.2	37.4	36.5	33.7	36.5	42.1	33.2	33.9	34.6	33.9	33.2	36.7	35.3
	18	39.9	44	38.4	38.4	42.1	40.2	47.6	38.7	37.3	36	34.6	34.6	36.7	37.3
	20	41.9	44.9	42.1	43	41.2	42.1	47.6	40.4	39.7	38.3	37	39.1	39.1	39.1
	22	45.3	47.6	44	44.9	43	44	49.5	41.4	41.4	39.3	37.9	40	40.6	40
	24	46.4	47.6	45.8	44.9	44.9	45.8	50.4	43.5	42.9	41.4	40.8	42.2	42	41.3
	26	48.5	48.1	49.1	46.1	46.6	47.1	50.1	43.1	42.2	42.4	43.5	42.7	42.2	43.3
	28	49.9	49.1	51.2	47.1	47.1	47.7	50.6	43.5	43.7	42.9	44.5	43.7	43.2	42.8
	30	50.2	50.7	51.1	47.9	48.1	48.1	51.1	43.7	44.6	43.1	41.8	44.2	43.2	42.7
B
	time	KO-control							Mir802 KO
	0	6.1	6.6	5.4	6.4	6.5	6.2	6.4	6.6	6.3	5.6	6.1	6.3	6.1	6.7
	2	5.8	6	6.3	7	5.6	6	6.4	5	5.8	6.2	6.5	6.1	6	6.5
	4	6.6	6	5.2	6	6.5	6	6.8	6.2	6.7	6.2	6.5	6.2	6.7	6.3
	6	6.4	6.2	6	6	7	6.2	6.5	6.6	6.3	6.6	6.1	6.2	7.3	6.7
	8	6.4	6.5	7.4	6.8	6.4	6.4	6.6	6	6.3	5.9	6.9	6.4	6.6	6.8
	10	6.6	7.4	6.5	7.3	6.1	6.6	6.5	6.9	6.9	6.8	5.8	6.2	8.2	6.7
	12	6.9	6.2	6.4	7.5	6.4	7.5	6.8	6.4	6.5	6.9	6.3	7	7.3	6.7
	14	6.5	6.9	7.1	6.5	7.1	6.5	6.8	6.6	6.9	7	6.2	5.9	7.2	6.3
	16	6.7	6.5	6.6	6.4	7.6	6.8	7.1	6.7	5.7	6.3	5.9	7.6	6.8	7.5
	18	6.7	7	7	6.9	7.2	7.6	6.2	6.8	5.7	4.9	6.8	7.1	7.1	7.9
	20	6.7	7.5	8.7	7.1	7	6.5	7.4	8.1	6.3	7.1	6.4	6.7	6.4	6.7
	22	6.5	7.9	7.1	7.8	7.4	8	7.5	6.8	7.7	7.1	6.9	6.8	7.5	6.6
	24	8.2	7.4	7.4	7	8.2	7.4	7.6	6	6.4	6.8	7	6.2	6.8	7.2
	26	8.6	8.4	7.9	7.4	7.2	7.7	6.8	7.6	7.6	7	7	6.2	6.4	7.5
	28	9.1	7.3	7.5	8.1	7.8	7	7.2	6.8	7.8	6.8	6.9	7.7	7.1	7.7
	30	7.2	7.6	6.2	8.7	7.7	8.9	9.7	6.6	6.8	7.2	7.7	6.4	6.4	7.4
C				D
	KO-control	Mir802 KO				KO-control
	12.73	8.424			EpiWAT	2.82	2.92	2.82	3	2.72	2.82	3
	12.831	8.047			RpWAT	1.05	1.17	1.26	1.19	1.12	1.14	1.16
	11.813	8.37			BAT	0.32	0.35	0.4	0.37	0.41	0.38	0.42
	11.924	7.96				Mir802 KO
	12.539	8.915			EpiWAT	2.31	2.1	2.14	2.04	2.2	2.1	2.13
	12.62	8.856			RpWAT	0.83	0.85	0.82	0.85	0.78	0.8	0.85
	11.621	8.37			BAT	0.3	0.4	0.31	0.38	0.31	0.35	0.34
E
		KO-control						Mir802 KO
	Visceral	6088.43	6235.97	5893.08	6535.1	5894.1		4305.24	4338.54	4514.86	4545.69	4538.91
	Subcutaneous	8067.35	8493.23	7975.87	8167.97	8103.94		7523.9	7819.24	7940.8	7591.33	7921.8
F
		0 weeks					8 weeks					16 weeks							0 weeks					8 weeks					16 weeks
	KO-control	0	0	0	0	0	2.3	2.2	2.1	2.4	2.3	4.2	4.6	4.7	4.6	4.3		KO-control	26.5777	37.9402	41.4422	40.4508	38.2707	129.226	122.34	108.481	104.719	105.605	135.768	172.736	129.369	161.91	146.647
	Mir802 KO	0	0	0	0	0	0.6	0.5	0.6	0.5	0.4	0.9	1.2	1.3	1.1	1.4		Mir802 KO	22.1789	39.3276	33.2564	38.6532	31.7538	75.3976	64.8484	75.5066	58.6169	74.5253	79.3659	68.2614	65.2053	79.0069	76.1419
G
	weeks	KO-control					Mir802 KO
	8	15.9	14.4	15.6	14.9	15.3	4.32	4.6	4.9	3.7	4.8
	16	23.4	23.4	23.8	24.9	25.2	9.32	9.8	8.3	8.3	9.1
	24	37.4	33.6	35.4	32.9	35.3	10.5	11.4	14.3	10.6	12.3
H
		KO-control					Mir802 KO
	Tnfα	1.02071	1.00179	0.990005	1.00583	1.04157	0.385246	0.577441	0.364367	0.361606	0.353378
	Il6	1.00439	0.995721	0.957779	1.04157	0.957698	0.463839	0.463839	0.407699	0.432942	0.430787
	Il1b	0.960743	1.00023	0.966835	1.01974	1.03569	0.407702	0.407702	0.424671	0.421599	0.396325
	Inos	0.958703	0.959729	1.01904	1.00575	0.978115	0.353422	0.351269	0.371935	0.443116	0.320701
	Ccl2	0.949181	1.00032	0.944437	1.02109	1.00026	0.322437	0.352999	0.320705	0.359614	0.320688
	Ifng	0.959027	1.02109	1.11832	1.11832	1.08047	0.252056	0.270716	0.251177	0.322755	0.273895
	Fizz1	0.995629	0.959743	1.03558	0.985271	1.00949	3.39851	3.20719	3.44278	3.44329	3.1957
	Chil3	1.0357	1.00943	1.02214	1.02241	1.04273	4.42377	4.43712	4.42371	4.42264	4.42464
	Arg1	1.00978	0.959773	1.04274	1.00575	1.12265	4.00481	3.70297	4.00511	3.79607	3.29088
	Il10	1.00583	0.959743	1.0427	0.959743	1.13475	2.98737	2.98303	2.24802	2.18572	2.4298
I
	weeks	KO-control					Mir802 KO
	0	181.027	186.213	187.695	193.622	183.497	183.25	193.375	195.845	171.148	180.78
	8	340.485	359.914	353.328	346.742	350.035	261.127	264.42	273.969	284.177	290.763
	16	537.73	550.901	524.558	533.449	553.865	339.827	336.863	323.692	340.156	320.399
	30	757.418	796.675	785.87	782.629	782.269	551.766	537.72	573.376	602.548	587.782
	0	97.6138	107.184	88.0438	98.5708	107.184	107.184	97.6138	88.0438	97.6138	88.0438
	8	190.597	185.596	168.926	173.927	190.597	112.802	117.803	106.69	117.803	101.133
	16	404.327	377.16	381.235	377.613	390.743	236.8	224.123	227.745	218.69	232.273
	30	826.352	802.726	820.014	796.963	773.913	480.598	457.548	486.361	503.648	515.174
	0	113.934	110.641	113.934	120.52	107.348	113.934	109.324	115.251	120.52	109.983
	8	191.708	202.266	213.38	218.936	213.38	90.5752	85.0185	90.0196	81.6844	90.0196
	16	450.468	457.054	463.64	443.882	457.054	200.208	225.234	245.65	252.236	277.262
	30	797.395	825.272	772.76	753.96	825.272	475.196	455.747	474.548	477.789	501.127
	0	92.3863	85.4918	84.8024	94.4547	97.9019	84.8024	91.0074	82.0446	84.8024	92.3863
	8	189.486	192.202	198.994	205.785	198.994	124.286	117.495	117.495	137.869	130.399
	16	319.905	339.899	333.694	346.793	360.582	195.114	209.593	229.587	222.692	223.382
	30	659.155	695.542	702.539	722.132	750.821	379.959	345.672	352.669	372.962	365.964
J
	weeks	KO-control						Mir802 KO
	8	1337	1340	1412	1092	1285		1253	988.5	1111	1229	1078
	16	1562	1788	1640	1513	1429		1233	1066	1019	1207	1166
	30	1522	1621	1676	1658	1639		1130	1019	1142	1024	879
K
		KO-control					Mir802 KO
	8	150.8	184.5	198.2	178.2	136.4	167.4	203.5	158.4	214.5	165
	16	117	157.5	145.5	165.8	124.5	163.5	253.5	174.8	162.8	207
	30	87.75	80.32	82.88	88.5	125.3	104.3	150.8	123.2	192	126.8
L							M				N
	HFD-control	Mir802 eWAT KO/HFD		HFD-control	Mir802 eWAT KD/HFD			HFD-control	Mir802 eWAT KO/HFD				CD86+CD206-
	12	7		131.596	109.645			35.8	17.8			HFD-control	50.8	48.5	47.4	50.3	51.3
	11	6		117.018	101.318			36.4	18.3			Mir802 eWAT KO/HFD	30.6	26	28	27	30
	14	4		116.718	98.1781			37.4	16.9				CD86-CD206+
	15	5		134.17	105.324			36.9	15.4			HFD-control	20.7	19.2	20.4	18.2	18.7
	14	3		119.784	96.6411			36.2	16.6			Mir802 eWAT KO/HFD	32.3	33.4	32.1	31.9	34.2
O
		HFD-control						Mir802 eWAT KO/HFD
	Tnfα	549.128	526.22	509.288	529.208	495.676	509.288	379.808	356.9	346.94	342.956	326.356	362.876
	Il6	704.256	685.056	688.896	704.256	685.056	646.656	492.672	470.016	431.616	419.712	489.216	458.496
	Il1b	627.708	609.608	678.388	609.608	645.808	613.228	431.866	445.984	428.608	421.368	396.028	445.984
	CCL2	892.911	878.598	856.211	893.278	870.891	874.561	533.618	567.382	527.012	511.598	522.608	294.334
P
	time	HFD-control				Mir802 eWAT KO/HFD					HFD-control	Mir802 eWAT KO/HFD
	0	11.2	10.1	9.2	10.2	10.9	10.9	9.6	8.1		1089	593.3
	15	32.8	32.8	30.2	29.8	28.7	25.9	29	26.7		1436	693
	30	30.3	31.7	28.3	29.3	22.3	18.9	20.1	26.9		1204	699.2
	60	17.2	20.3	20.3	18.2	12.4	15.2	13.7	14.1		1088	1040
	90	16.8	19.7	13.3	14.3	10.1	16.2	11.3	12.5
	120	9.7	11.1	9.4	10.3	9.8	10.9	8.2	9.8

## Sheet: Figure 3- figure supplement 1
C
		KO-control			Mir802 KO
	EpiWAT	0.988123	0.987688	1.00211	0.295557	0.352417	0.312644
	ScWAT	0.971274	1.00887	0.935635	0.284249	0.259	0.348855
	BAT	0.976894	0.988123	0.987085	0.322142	0.34193	0.352417
	Liver	0.928731	0.928731	0.988171	0.988123	0.971747	0.935627
	Muscle	1.009	1.08059	0.987203	0.97823	0.976815	0.987767
	Pancreas	0.918867	1.0797	1.08023	0.986709	0.986153	0.983117
	Heart	0.986709	0.987035	1.00904	0.977141	0.988156	0.986709						E					F																G
														weeks	NCD-control	NCD-Mir802 KO				NCD-control							NCD-Mir802 KO								time	NCD-control							NCD-Mir802 KO
														0	0	0			0	6.3	6.5	6.5	5.3	5.1	5.7	5.3	6.4	5.8	6.4	6.4	5.4	6.4	6.4		0	21	22	22.8	22	21.8	20.7	21	21.9	22.9	21.3	21.1	21.8	20.5	21
D		KO-control			Mir802 KO									1	16.1	16.6			2	6.4	6.4	6.5	5.9	6.4	5.9	6.4	6.5	6.4	6.9	6.2	5.9	5.4	6.3		2	21.5	21.8	22.9	22.1	22.3	21.2	22	22.4	22.9	23	21.2	22.1	21.1	22
	Adipocyte	0.987	1.013	0.968	0.32389	0.29837	0.327							2	38.1	39.8			4	6.4	5.3	6.9	6.4	5.4	5.6	6.4	6.4	6.4	6.8	6.1	5.5	6	5.2		4	22	22.3	23.2	23.1	22.8	21.9	22.3	22.6	22.9	23.3	22.3	22.9	21.8	23.1
	SVF	0.9987	1.087	0.9878	1.0989	0.987	0.9897							3	62.9	66.9			6	5.3	6.9	6.7	5.9	5.3	5.9	6.5	6.9	6.6	6.5	6.3	6.4	6.4	7.3		6	23	23.1	22.1	23.9	24	22.3	23.1	23.4	24	24.3	23.3	24	24	24.4
														4	85.9	88.3			8	6.9	5.9	6.4	6.6	5.3	5.8	6.3	6.4	6.8	5.5	5.3	5.9	5.4	6.9		8	24	24.9	24	25	25.4	23.2	25.1	24	25	24.8	24.9	25	25.4	25.1
														5	108.8	114.5			10	6.3	6.4	6.9	6.6	6.9	5.2	5.9	6.1	5.6	5.3	6.9	6.3	6.1	6.9		10	25	26	25	26	26	24	26	25.2	24.8	25.2	25.2	25.8	25.1	25.2
M	time	KO-control						Mir802 KO						6	133.1	133.7			12	6.3	5.7	5	5.4	6.4	6.4	5.3	6.3	6.4	6.4	5.4	5.3	5.7	6.5		12	27	27	25.6	25	26.9	25	26.6	26.2	25.1	26.1	26.7	26.2	26.1	25.2
	0	6.7	6.3	5.8	7.9	7		6.9	6.8	6.4	5.8	6.4		7	160.8	157.8			14	5.7	5.4	6.7	6.1	5.3	5.6	6.7	6.7	5.5	5.6	6.8	5.5	5.4	6.1		14	27.4	27	26.6	27	27	25.5	25.9	26.2	26.1	26.6	27.1	26.5	26.2	25.2
	15	26.7	25	24.6	24.4	26.3		26.1	25.6	25.9	26.2	27		8	190.7	192.9			16	6.3	5.4	5.6	6.4	6.3	5.5	6.7	6.5	6.4	6.3	5.5	6.5	5.4	6.3		16	27.6	26.7	27	28	27.6	26	26.5	26.2	26.7	26.2	27.1	26.2	27.1	28.1
	30	28	27.4	26.8	24.5	25.3		27.6	26	27.7	25.1	24.5		9	216.9	220.1			18	6.4	6.4	6.3	6.4	6.3	5.3	5.9	6.5	6.5	5.2	6.3	5.5	6.9	5.5		18	26	27	27.6	27.8	28	26.9	26.6	26.2	26.7	26.2	27.1	28.1	28.1	28.9
	60	17.9	17	18.5	18.9	20		15.4	12.6	13.9	15.2	14.3		10	234.6	236.4			20	6.3	6.3	6.4	6.3	6.2	5.6	6.2	6.6	6.5	6.5	6.7	5.3	6.5	6.9		20	27	28	28	28	28.6	27	28	27.7	28.1	27	27.1	29	29.6	28.9
	90	11.8	12.8	13.6	12.9	12.2		12.7	9.2	8.9	10.9	9.2		11	252.2	262.1			22	5.4	6.8	5.9	6.4	6.1	6.2	6.4	6.7	6.7	6.9	6.3	5.5	5.5	6.5		22	27	28.5	28	28.6	27.6	29	29	29.1	30	28.2	28.6	28	26.3	28
	120	11.3	10.9	8.6	7.1	9.5		11.6	8.7	9	9.4	9.1		12	263.6	266.1			24	6.3	5.4	6.4	6.5	5.9	6.4	6.6	5.2	6.6	6.4	6.9	6.5	5.3	6.9		24	27.4	28.5	28.4	29	28	28	29.5	30	28.8	29.1	28.5	27.2	29.1	28.1
														13	271	273			26	6.3	6.2	6.5	6.9	6.2	6.7	6.5	6.8	6.7	5.5	5.1	6.1	5.3	7.5		26	28	28	28.6	29.5	29	29.1	29.9	30	29.1	30.1	28.2	27.3	28.7	28.2
														14	277.5	279.9			28	5.3	6.1	6.7	6.9	6.3	6.7	6.8	6.5	5.3	6.3	6.9	6.9	5.1	6.5		28	28.4	28.5	28.9	29.9	29.8	29.9	30.3	31	30.2	28.7	29.1	27.5	30	28.6
N														15	296.5	299			30	6.1	5.2	5.1	6.9	5.3	6.4	6.5	5.4	6.3	6.4	6.3	6.9	5.1	6.9		30	28.9	29.5	29	30.9	31.4	30	30.4	30.8	31	29.1	29.8	28	30	27.9
	time	KO-control						Mir802 KO						16	315.1	318
	0	7.8	6.5	8.4	7	7.2		7.9	8.2	7.4	6.4	6.4		17	333.7	336.9
	15	28.3	27.4	29.4	30.2	27.3		28.3	27.3	26.3	25.5	29.3		18	352.3	355.9			L
	30	28.3	29.3	30.3	28.3	28.3		26.3	24.3	22.3	24.3	21.3		19	370.9	374.8					0 weeks					8 weeks					16 weeks
	60	24.5	25.4	26.3	24.4	21.3		19.3	18.3	16.8	18.3	19.3		20	389.5	393.8				KI-control	25.8135	31.0162	23.2488	35.7039	34.1923	67.2635	62.6833	76.8312	84.6313	62.5265	76.3071	76.3071	74.1541	82.3103	83.3318
	90	16.3	17.3	17.8	12.3	14.3		13.4	12.3	11.4	10.3	9.3		21	408.1	412.8				Mir802 KI	26.4828	31.045	47.8364	27.6817	45.0319	69.2433	83.3912	91.1913	72.6972	73.8235	77.0813	81.1085	82.2496	63.3781	67.2886
	120	10.3	11.2	9.3	7.3	8.3		8.3	7.3	7.3	9.3	7.3		22	426.7	431.7
														23	445.3	450.7
														24	464	469.7
O														25	482.6	488.6
	time	KO-control						Mir802 KO						26	501.2	507.6
	0	8.2	7.9	7.2	7.7	7.3		7.9	8.3	7.3	7.2	8.2		27	519.8	526.5
	15	30.4	29.4	29.3	28.3	30.2		27.3	27.3	26.3	26.3	28.3		28	538.4	545.5
	30	29.3	28.8	29.3	28.3	30.2		23.2	21.3	23.8	22.3	20.2		29	557	564.5
	60	23.4	25.4	26.3	24.3	24.3		19.3	18.3	17.9	16.3	17.3		30	575.6	583.4
	90	15.3	16.3	15.3	19.3	14.3		12.3	13	11.4	10.3	9.3
	120	11.2	11.3	9.3	10.3	11.3		9.3	8.3	10.3	9.3	8.3
P	time	KO-control					Mir802 KO
	0	7.3	7.8	7.5	7.9	7.6	6.7	7.7	7	6.9	7.6
	15	6.5	6.7	7.2	7.3	7.3	6.1	6.2	5.9	6.1	6.5
	30	6.7	6.4	6.5	6.2	6.8	5.3	5.4	4.9	4.6	5.4
	60	5.2	5.1	4.8	5.2	5.2	4.4	4.2	4.1	4.4	4.5
	90	6.4	7.1	6.4	6.9	6.7	6.7	6.2	6.3	6.1	6.7
	120	7.2	7.3	7.2	7.4	7.4	6.8	7.1	6.8	6.9	7.1
Q
	time	KO-control					Mir802 KO
	0	7.3	7.8	7.5	7.9	7.6	6.7	7.7	7	6.9	7.6
	15	6.5	6.7	7.2	7.3	7.3	5.3	6.2	5.9	6.1	6.5
	30	6.7	6.4	6.5	6.2	6.8	4.6	5.4	4.9	4.6	5.4
	60	5.2	5.1	4.8	5.2	5.2	4.4	4.2	4.1	4.4	4.5
	90	6.4	7.1	6.4	6.9	6.7	6.7	6.2	6.3	6.1	6.7
	120	7.2	7.3	7.2	7.4	7.4	6.8	7.1	6.8	6.9	7.1
R
	time	KO-control					Mir802 KO
	0	8.5	8.6	7.9	8.4	8.6	6.9	7.5	6.8	7.8	7.4
	15	8.1	8.3	7.5	8.3	7.9	6.2	6.8	6.1	6.9	7
	30	7.4	7.8	7.1	8.2	7.3	5.6	5.2	4.4	5.6	5.7
	60	7.5	7.2	6.4	6.5	6.7	5.3	5.4	4.9	5.4	5.3
	90	7.6	8.1	7.4	7.8	7.9	6.3	6.7	6.9	6.2	7
	120	8.5	9.2	8.2	7.9	8.1	7.2	7.4	6.9	7.2	6.9
[truncated: 2 more columns]

## Sheet: Figure 3- figure supplement 2
B
		HFD-control			Mir802 eWAT KO/HFD
	Pancreas	0.952638	1.03527	1.01396	0.844791	1.08646	0.933161
	Liver	1.08423	1.08423	0.850667	1.05321	1.07053	1.12874
	Heart	1.04043	0.991869	0.819794	0.972655	1.04247	1.04972
	Muscle	1.04006	0.983957	0.97716	1.02562	1.06289	1.00737
	BAT	0.982174	0.97892	0.99783	0.77183	0.7783	0.7613
	Kidey	0.99893	0.98863	0.99782	0.997377	0.933736	0.991869
	Adipocyte	0.990801	0.997692	1.01162	0.297377	0.333736	0.291869
C
	weeks	HFD-control							Mir802 eWAT KO/HFD
	0	38.4	39.2	37.4	38.3	40.3	41.3	42.1	39.4	41.3	38.4	39.4	38.2	40.2	39.2
	2	43.3	42.3	40.3	42.3	42.3	43.4	44.3	40.3	41.3	39.4	40.3	40.3	41.3	39.3
	4	45.5	46.4	44.4	43.4	45.5	46.5	46.9	41.4	42.3	42.3	41.4	42.4	42.8	43.3
	6	46.5	47.6	48.4	47.9	48.4	46.4	48.2	44.4	45.6	45.6	46.5	43.5	44.5	44.8
	8	48.5	49.4	47.4	50.3	46.4	47.9	49.5	46.5	45.4	45.9	46.4	45.9	46.4	46.5
F
	time	HFD-control					Mir802 eWAT KO/HFD						HFD-control	Mir802 eWAT KO/HFD
	0	9.8	8.9	8.9	7.9	8.3	8.4	8.9	9.3	9.5	7.3		246.8	356.3
	15	8.9	8.9	9.1	8.7	8.3	6.3	5.4	4.6	6.3	5.4		180	429
	30	7.5	6.9	7.6	6.4	7.6	4.5	4.9	4.3	5.2	4.2		138.7	486
	60	6.4	5.7	6.4	5.8	6.4	4.1	3.2	3.9	3.4	4.5		94.59	492.8
	90	7.4	7.9	7.5	7.8	8.5	5.8	5.7	5.8	4.8	4.7		70.04	250.2
	120	9.3	8.3	9.5	8.4	8.3	6.4	7.6	6.9	7.9	8.2

## Sheet: Figure 4
B
		NCD-SVF					HFD-SVF
	Migration	73	79	93	122	109	266	196	277	245	252
	Invasion	79	88	64	61	72	246	315	297	337	294
C
		CD86+CD206-						CD86-CD206+
	NCD-SVF	16.1	15.7	13.6	14.9	14.4		15.3	15.7	21.5	13.1	20.9
	HFD-SVF	24.3	25.38	23	24.8	26.4		6.32	5.39	6.4	5.3	6.38
D
		NCD-SVF						HFD-SVF
	TNF-α	257.32	263.49	273.32	269.38	268.43	273.21	1362.29	1362.32	1376.32	1436.32	1382.32	1462.32
	IL-6	203.32	213.32	221.32	222.31	209.32	198.32	1172.21	1098.32	1163.42	1253.32	1129.32	1316.21
	IL-1β	113.83	119.42	121.32	114.32	123.38	117.32	998.3	1092.24	1032.32	1047.22	1073.42	1047.42
	CCL2	473.24	476.98	468.43	432.43	458.32	427.43	1873.42	1874.93	1983.42	1972.39	1934.38	1874.42
E													F	NCD-SVF	HFD-SVF
		NCD-medium					HFD-medium							0.9823	0.9128
	Migration	66	72	52	55	59	155	267	302	249	201			0.9283	0.9838
	Invasion	62	79	61	67	62	525	412	559	435	409			0.9872	1.01298
														1.02189	0.9873
														1.0128	0.9839
G
		NCD-medium						HFD-medium							H
	CCL2	233.32	218.32	219.32	223.34	219.23	223.42	984.32	947.43	1238.24	1093.42	983.42	1093.32			miR-NC	Mir802	anti-NC	anti-Mir802
	CCL7	174.23	183.32	178.24	167.42	178.42	173.73	213.4	209.42	203.21	203.34	217.32	221.32			1.18555	1.00062	0.98093	0.812565
	CCL8	178.413	170.399	164.34	163.32	175.32	170.32	212.32	224.21	209.21	213.42	223.49	213.42			0.943148	1.15354	0.967425	1.16518
	CCL19	212.155	246.32	269.43	274.23	259.32	267.42	298.42	309.42	298.42	303.34	312.32	308.23			1.23589	1.07662	0.877957	1.09285
	CCL21	140.031	132.017	132.31	138.21	123.83	142.24	198.21	189.38	203.33	209.32	198.32	206.21
	CXCL2	149.31	169.977	178.39	187.31	178.38	165.39	214.3	209.32	201.32	209.32	198.36	213.93
	CXCL13	173.773	170.399	186.32	189.32	209.31	214.83	265.38	267.39	276.43	287.32	298.38	269.32
I
		miR-NC			Mir802			anti-NC			anti-Mir802
	Migration	132	129	142	382	368	382	134	39	141	56	62	59
	Invasion	143	122	153	344	336	388	129	146	134	42	36	37
J
		CD86+CD206-			CD86-CD206+
	miR-NC	15.9	16.2	16.4	23.8	24.3	23.4
	Mir802	22.5	23.4	23.6	4.82	4.32	4.63
	anti-NC	16.6	16.2	15.3	22.4	23.2	22.1
	anti-Mir802	11.4	10.3	11.9	36.4	37.7	38.3
K
		WT+PBS					WT+CLOD					Mir802 KI+PBS					Mir802 KI+CLOD
	TNF-α	256.85	249.25	268.9	239.15	253.15	146.9	151.15	141.7	173.65	137.4	487.15	522.15	471.6	542.1	566.7	166.6	176.6	146.95	151.15	156.6
	IL-6	280.317	289.583	259.612	291.961	317.012	178.022	181.671	194.012	169.412	197.702	669.694	722.912	694.212	653.212	710.161	206.312	177.161	190.322	210.412	185.812
	IL-β	366.744	379.344	362.544	387.702	391.566	211.806	207.564	215.796	223.524	194.544	568.344	602.364	581.364	602.364	564.69	215.544	207.564	224.364	232.764	198.744
	CCL2	633.28	649.28	612.92	689.24	641.28	560.92	568.52	612.88	573.08	573.68	837.24	852.84	817.28	837.24	845.28	773.2	773.2	785.2	813.2	793.2
L						M
	WT+PBS	WT+CLOD	Mir802 KI +PBS	Mir802 KI +CLOD			Time	WT+PBS							WT+CLOD							Mir802 KI+PBS							Mir802 KI+CLOD
	3.78	2.763	5.26	2.97			0	6.8	5.4	6.4	7.4	5.7	6.9	5.8	5.4	4.5	6.2	4.2	4.2	5.3	5.6	4.9	7.5	5.8	6.4	6.5	7.1	5.9	4.7	5	5.6	6.5	7.3	5.6	7.2
	3.96	2.87	4.97	2.68			15	23.3	24.4	23.7	25.4	23.5	25.4	20.4	25.5	23.6	25.2	20	21.4	20.1	25.4	21.5	23.3	24.2	24.3	25.4	22.8	20.8	26.3	22.6	21.4	23.4	23.6	25.3	23.5
	3.68	2.58	5.32	3.08			30	20.3	21.2	19.2	18.3	18.9	18.3	19.2	12.8	11.3	14.3	12.8	15.2	10.6	9.2	22.2	21.2	21.9	21.2	20.3	21.3	23.3	13.5	12.3	15.3	14.5	14.5	15.3	14.3
	3.68	2.69	5.38	2.89			60	14.5	15.3	15.4	16.3	15.4	14.7	14.5	9.2	10.7	14.3	7.7	11.7	8	8.3	16.5	19.2	20.6	19.2	17.3	19.2	18.2	12.3	9.9	12.3	13.4	11.3	10.3	11.3
	3.69	2.76	4.68	2.86			90	8.2	10.2	11.3	13.2	12.3	10.3	9.2	8.7	8.2	9.7	9.2	10.6	6.3	8.2	10.6	13.2	13.3	12.3	13.4	14.6	15.7	11.1	7	9.2	10.2	9.3	8.3	11.3
	3.57	2.59	4.87	2.68			120	7.4	8.3	9.2	10.2	8.3	9.3	10.3	8.6	7.5	10	8.2	8.3	7.2	6.9	8.9	9.8	11.1	10.2	12.3	11.2	10.2	8.7	6.6	10.3	11.3	8.2	9.3	8.3
	3.79	2.75	4.79	2.97
							WT+PBS	WT+CLOD	Mir802 KI+PBS	Mir802 KI+CLOD
							833.3	729	1217	1002
							1125	781.5	1102	659.3
							1007	872.3	1387	834.8
							998.3	745.5	1220	823.5
							1092	984	1212	600
							906	480.8	1205	791.3
							951	556.5	1343	666.8

## Sheet: Figure 4- figure supplement 1
A				B
	NCD-SVF	HFD-SVF			NCD-SVF	HFD-SVF
	9.82	25.42			11	26.1
	9.12	28.32			8.68	25.5
	9.53	29.23			12.4	25.7
D						E
	miR-NC	Mir802	anti-NC	anti-Mir802			miR-NC	Mir802	anti-NC	anti-Mir802
	0.9982	243.3	0.983	0.2012			33.8	33.2	34.2	34.3
	0.9628	248.3	1.09128	0.1928			33.2	34.3	35.9	34.2
	1.09218	244.3	0.9637	0.2129			34.2	35.2	34.8	35.2
F						G
	miR-NC	Mir802	anti-NC	anti-Mir802			miR-NC	Mir802	anti-NC	anti-Mir802
	37.5	38.4	38.7	36.3			5.84	5.92	5.43	4.86
	35.9	38.6	38.9	37.5			6.08	5.78	5.78	5.42
	36.4	39.7	37.3	37.3			5.42	5.73	5.83	5.39
H
	miR-NC	Mir802	anti-NC	anti-Mir802
	447.411	791.573	466.699	205.363
	466.321	806.701	477.667	212.927
	496.955	821.829	451.193	212.927
	481.449	836.957	458.757	205.363
	451.193	825.232	485.231	224.273
	474.263	783.63	432.283	186.453

[truncated: 6 more sheets: Figure 4- figure supplement 2, Figure 5, Figure 5- figure supplement 1, Figure 6, Figure 7, Figure 7- figure supplement 1]
