# Supplementary material for: Adipocyte microRNA-802 promotes adipose tissue inflammation and insulin resistance by modulating macrophages in obesity
Source: eLife. 2024 Nov 26;13:e99162. doi: 10.7554/eLife.99162 (PMC11651656; doi:10.7554/eLife.99162)
Supplement: Source data 2. [file elife-99162-data2.xls]

## Sheet: Figure 5
B
	β-Actin	Area				TRAF3	Area				TRAF3/β-Actin	Area
	Normal-1	14015.3	14124.4	14179.2		Normal-1	15653.3	15423	15321.5		Normal-1	1.11687	1.09194	1.08056
	Normal-2	13986.1	14015.8	13959.7		Normal-2	17579.5	17000.7	17151.8		Normal-2	1.25693	1.21297	1.22867
	Normal-3	12601.3	12549.8	12624.3		Normal-3	15717.3	15562.8	15405.7		Normal-3	1.24728	1.24008	1.22033
	Normal-4	15330.1	15452.5	15401.8		Normal-4	16231.3	15973.7	16043.7		Normal-4	1.05878	1.03372	1.04167
	Obesity & IR-1	14304.7	14174.3	14125.5		Obesity & IR-1	3553.3	3379.18	3438.6		Obesity & IR-1	0.248402	0.238403	0.243431
	Obesity & IR-2	13540	13540	13547		Obesity & IR-2	3983.01	3810.3	3767.6		Obesity & IR-2	0.294167	0.281412	0.278114
	Obesity & IR-3	14360.5	14360.5	14450		Obesity & IR-3	3247.96	2969.01	3089.55		Obesity & IR-3	0.226173	0.206748	0.21381
	Obesity & IR-4	15457.7	15522.4	15185.1		Obesity & IR-4	2444.3	2501.55	2382.01		Obesity & IR-4	0.158129	0.161158	0.156865
	Obesity & IR-5	14033.7	13925.5	14219.8		Obesity & IR-5	3676.3	3841.96	3763.55		Obesity & IR-5	0.261963	0.275893	0.26467
	Obesity & IR-6	14367.8	14449	14428.3		Obesity & IR-6	3609.84	3355.43	3425.13		Obesity & IR-6	0.251244	0.232226	0.237391
	Obesity & IR-7	14734.3	14831	14831		Obesity & IR-7	3814.55	3557.3	3765.26		Obesity & IR-7	0.25889	0.239857	0.253878
	Obesity & IR-8	11699.5	11577.5	11577.5		Obesity & IR-8	3977.84	3865.26	3721.43		Obesity & IR-8	0.34	0.333858	0.321435
	Obesity & IR-9	11782	11751.8	11865.3		Obesity & IR-9	4085.98	3001.84	2992.84		Obesity & IR-9	0.3468	0.255436	0.252236
C
	β-Actin	Area				TRAF3	Area				TRAF3/β-Actin	Area
	NCD-1	22623.2	22319.4	22751.2		NCD-1	26080.8	25123.6	25341.6		NCD-1	1.15283	1.12564	1.11386
	NCD-2	23509.7	23690.8	23449.7		NCD-2	25149.5	25642.5	26418.2		NCD-2	1.06975	1.08238	1.12659
	NCD-3	23141.7	23027.2	23140		NCD-3	21769.5	22097.9	22183.3		NCD-3	0.940706	0.959642	0.958659
	HFD-1	20870.1	20976.8	21052.2		HFD-1	12189.4	12361	12042		HFD-1	0.584061	0.589267	0.572006
	HFD-2	20215.9	20312.7	20121.5		HFD-2	8661.37	8527.54	8310.32		HFD-2	0.428443	0.419813	0.413007
	HFD-3	26915.8	27113.8	26340.4		HFD-3	10201.7	10145.3	9921.71		HFD-3	0.379023	0.374174	0.376672
D
	β-Actin	Area				TRAF3	Area				TRAF3/β-Actin	Area
	KI-control-1	26846.7	26773	26584.2		KI-control-1	19124.7	19283.7	19634.8		KI-control-1	0.712368	0.720268	0.738589
	KI-control-2	25714.8	25571.4	25572.4		KI-control-2	24742.7	24641	24976.7		KI-control-2	0.962194	0.963613	0.976703
	KI-control-3	24551.8	24497.1	24252.3		KI-control-3	28975.1	28682.7	28152.7		KI-control-3	1.18016	1.17086	1.16082
	Mir802 KI-1	25217.7	25175.2	25483.5		Mir802 KI-1	14286.8	14395.2	14286.8		Mir802 KI-1	0.566541	0.571802	0.560631
	Mir802 KI-2	24964.4	24966.1	24708.5		Mir802 KI-2	12414.1	12313.3	12414.1		Mir802 KI-2	0.497274	0.493201	0.502422
	Mir802 KI-3	27761.5	27905.2	27928.5		Mir802 KI-3	12325.4	12143.2	12287.3		Mir802 KI-3	0.443975	0.435158	0.439956
F
	β-Actin	Area				TRAF3	Area				TRAF3/β-Actin	Area
	miR-NC	24169.6	24107.9	24199.6		miR-NC	17268	17143.9	17207		miR-NC	0.714453	0.711133	0.711044
	Mir802	24314.6	24335.6	24377		Mir802	8989.44	9496.09	9240.77		Mir802	0.369714	0.390215	0.389552
	Anti-NC	22362.6	22747.4	22194.5		Anti-NC	18850.5	19906.9	19370.7		Anti-NC	0.842945	0.875125	0.896928
	Anti-Mir802	22509.9	22135.6	22456.9		Anti-Mir802	27607.4	27893.2	27755.3		Anti-Mir802	1.22646	1.26011	1.24208
H
	β-Actin	Area				TRAF3	Area				TRAF3/β-Actin	Area
	Control-1	14689.7	14358.7	13994.6		Control-1	8536.18	8857.99	7195.89		Control-1	0.581099	0.616908	0.514192
	Control-2	14013	13614.3	13175.7		Control-2	9211.31	9716.87	9247.71		Control-2	0.657339	0.713725	0.737482
	Control-3	15058.4	14764.3	14440.7		Control-3	8963.35	9406.52	9871.85		Control-3	0.595239	0.637114	0.65139
	Mir802 KI-1	14439.1	14083	13691.4		Mir802 KI-1	3867.23	4055.6	4253.38		Mir802 KI-1	0.26783	0.287977	0.296216
	Mir802 KI-2	12856.3	12341.9	11776.1		Mir802 KI-2	3988.89	4183.34	4387.5		Mir802 KI-2	0.310267	0.338953	0.372576
	Mir802 KI-3	12922.7	12415	11856.5		Mir802 KI-3	5041.35	5288.42	5547.84		Mir802 KI-3	0.390116	0.425971	0.446036
	Traf3 eWAT OE-1	12707.3	12178	11595.8		Traf3 eWAT OE-1	14084	14783.2	15517.4		Traf3 eWAT OE-1	1.10834	1.21392	1.27487
	Traf3 eWAT OE-2	13927.3	13520	13072		Traf3 eWAT OE-2	13432.2	14098.8	14798.7		Traf3 eWAT OE-2	0.964453	1.04281	1.07855
	Traf3 eWAT OE-3	12620	12082	11490.2		Traf3 eWAT OE-3	12166.2	12769.5	13403		Traf3 eWAT OE-3	0.964039	1.0569	1.16647
	Mir802 KI & Traf3 eWAT OE-1	13491	13040.1	12544.1		Mir802 KI & Traf3 eWAT OE-1	6207.94	6513.34	6834		Mir802 KI & Traf3 eWAT OE-1	0.460154	0.499485	0.519234
	Mir802 KI & Traf3 eWAT OE-2	12555.3	12010.8	11411.9		Mir802 KI & Traf3 eWAT OE-2	6762.84	7095.98	7445.78		Mir802 KI & Traf3 eWAT OE-2	0.538644	0.590798	0.621805
	Mir802 KI & Traf3 eWAT OE-3	13502.5	13052.8	12558.1		Mir802 KI & Traf3 eWAT OE-3	6232.55	6539.18	6861.13		Mir802 KI & Traf3 eWAT OE-3	0.461583	0.500979	0.520714

## Sheet: Figure 5- figure supplement 1
B
	β-Actin	Area				TRAF3	Area				TRAF3/β-Actin	Area
	Lepob/+-1	21413.5	22692.3	24047.8		Lepob/+-1	23363.1	23235.7	23329.4		Lepob/+-1	1.09105	1.02395	0.970125
	Lepob/+-2	22962.5	22334.3	25788.3		Lepob/+-2	26243.4	26467.5	26385.5		Lepob/+-2	1.14288	1.18506	1.02316
	Lepob/+-3	20332.8	21546.8	22833.6		Lepob/+-3	22494	22471	22512.5		Lepob/+-3	1.10629	1.04289	0.985937
	Lepob/ob-1	20685.7	21920.9	23230.1		Lepob/ob-1	14473.2	14354.8	14444		Lepob/ob-1	0.69967	0.654845	0.621778
	Lepob/ob-2	25265.5	25775.5	28376		Lepob/ob-2	12697.9	12766.3	12762.1		Lepob/ob-2	0.502578	0.495289	0.44975
	Lepob/ob-3	26196.2	27762	29421.7		Lepob/ob-3	13271.8	13244.1	13287.9		Lepob/ob-3	0.50663	0.477058	0.451637
C
	β-Actin	Area				TRAF3	Area				TRAF3/β-Actin	Area
	Leprdb/+-1	27259.7	27195	27915.3		Leprdb/+-1	19675.4	20366.2	19453.8		Leprdb/+-1	0.721778	0.748898	0.696888
	Leprdb/+-2	26198	26160.2	26867.1		Leprdb/+-2	28557.1	28501.8	27962.5		Leprdb/+-2	1.09005	1.08951	1.04077
	Leprdb/+-3	27855.4	28093.2	28662.3		Leprdb/+-3	22924.7	22537.7	22164.2		Leprdb/+-3	0.822989	0.802246	0.773287
	Leprdb/db-1	28376.4	28314.7	29033.5		Leprdb/db-1	11499.8	11183.3	10774.6		Leprdb/db-1	0.405261	0.394965	0.371108
	Leprdb/db-2	27879.7	27804	28529.8		Leprdb/db-2	11160.1	11394.9	10710.5		Leprdb/db-2	0.400294	0.40983	0.375413
	Leprdb/db-3	28781.2	28781.2	29469.2		Leprdb/db-3	9126.78	9000.37	8496.58		Leprdb/db-3	0.317109	0.312717	0.288321
D
	β-Actin	Area				TRAF3	Area				TRAF3/β-Actin	Area
	KO-control-1	24339.9	25039.3	25041.6		KO-control-1	14177	14210.8	14211.4		KO-control-1	0.582457	0.56754	0.567509
	KO-control-2	22745.9	23429.3	23431.6		KO-control-2	13507.4	13507.8	13507.8		KO-control-2	0.59384	0.576533	0.576477
	KO-control-3	20406.1	21066.2	21068.4		KO-control-3	14766.4	15029.7	15034.1		KO-control-3	0.723627	0.713453	0.713587
	Mir802 KO-1	20417	21077.1	21079.3		Mir802 KO-1	28097	28826.8	28839		Mir802 KO-1	1.37616	1.36768	1.36812
	Mir802 KO-2	23249.7	23938.2	23940.5		Mir802 KO-2	24735.7	25297.5	25306.9		Mir802 KO-2	1.06391	1.05678	1.05707
	Mir802 KO-3	24771.4	25475.1	25477.4		Mir802 KO-3	26135.4	26767.2	26777.7		Mir802 KO-3	1.05507	1.05072	1.05104

## Sheet: Figure 6
A
	β-Actin	Area				TRAF3	Area				TRAF3/β-Actin	Area
	miR-NC	34297.6	34672.5	34676.3		miR-NC	14462	14486.5	14486.8		miR-NC	0.421663	0.417809	0.417774
	Mir802	34686.2	34922.8	34925.1		Mir802	9531.42	9398.67	9396.9		Mir802	0.27479	0.269127	0.269058
	Anti-NC	36381.5	36818.9	36823.3		Anti-NC	18632.1	18823.4	18825.9		Anti-NC	0.512131	0.511241	0.51125
	Anti-Mir802	30850.3	31121.8	31124.5		Anti-Mir802	24362	24782.5	24788.1		Anti-Mir802	0.789683	0.796305	0.796415
						NIK	Area				NIK/β-Actin	Area
						miR-NC	32087.5	32392.2	32394.3		miR-NC	0.93556	0.934233	0.934191
						Mir802	46034.1	46497.8	46500.9		Mir802	1.32716	1.33145	1.33144
						Anti-NC	29406.6	29537.7	29538.6		Anti-NC	0.808284	0.802243	0.802171
						Anti-Mir802	21202.6	21169.7	21169.4		Anti-Mir802	0.687274	0.680219	0.680153
B
	β-Actin	Area				TRAF3	Area				TRAF3/β-Actin	Area
	KI-control-1	22342.1	23022.9	23027.5		KI-control-1	19803	20433.1	20437.3		KI-control-1	0.886355	0.88751	0.887517
	KI-control-2	21010.1	21664.3	21668.7		KI-control-2	19628.7	20255.3	20259.5		KI-control-2	0.93425	0.93496	0.934965
	KI-control-3	21384.7	22046.4	22050.8		KI-control-3	24898.9	25630.9	25635.7		KI-control-3	1.16433	1.16259	1.16258
	Mir802 KI-1	23416.2	24118.6	24123.3		Mir802 KI-1	13498.6	14002.6	14005.9		Mir802 KI-1	0.576463	0.580572	0.580598
	Mir802 KI-2	26560.2	27325.5	27330.6		Mir802 KI-2	14749.6	15278.6	15282.1		Mir802 KI-2	0.555326	0.559134	0.559158
	Mir802 KI-3	24752	25481	25485.9		Mir802 KI-3	11198.7	11656.7	11659.7		Mir802 KI-3	0.452437	0.457465	0.457498
						NIK	Area				NIK/β-Actin	Area
						KI-control-1	17746.8	18375.7	18379.9		KI-control-1	0.794321	0.798149	0.798174
						KI-control-2	18452.2	19095.2	19099.5		KI-control-2	0.878252	0.881413	0.881433
						KI-control-3	17831.6	17522.2	17526.8		KI-control-3	0.83385	0.79479	0.79484
						Mir802 KI-1	29822.1	30572.6	30577.6		Mir802 KI-1	1.27357	1.26759	1.26756
						Mir802 KI-2	31518.4	32302.8	32308		Mir802 KI-2	1.18668	1.18215	1.18212
						Mir802 KI-3	26615.2	27301.6	27306.1		Mir802 KI-3	1.07528	1.07145	1.07142
C
	β-Actin	Area				P100	Area				P100/β-Actin	Area
	miR-NC	38306.3	36590.9	36619.5		miR-NC	20948.8	20101.4	20115.5		miR-NC	0.546877	0.549354	0.549311
	Mir802	35895.5	34300.7	34327.3		Mir802	10447.3	10124.9	10130.3		Mir802	0.291048	0.295182	0.29511
	Anti-NC	33689.4	32204.9	32229.6		Anti-NC	21205.1	20344.9	20359.2		Anti-NC	0.629431	0.631733	0.631693
	Anti-Mir802	36055.8	34453	34479.7		Anti-Mir802	36641.3	35009.2	35036.4		Anti-Mir802	1.01624	1.01615	1.01615
						P52	Area				P52/β-Actin	Area
						miR-NC	26514.5	25388.8	25407.6		miR-NC	0.692172	0.693855	0.693825
						Mir802	39342.6	37575.4	37604.9		Mir802	1.09603	1.09547	1.09548
						Anti-NC	24051.8	23049.2	23065.9		Anti-NC	0.713929	0.715706	0.715675
						Anti-Mir802	18521.1	17795	17807.1		Anti-Mir802	0.513678	0.516501	0.516452
D
	β-Actin	Area				P100	Area				P100/β-Actin	Area
	KI-control-1	19699.8	19837.8	19839.2		KI-control-1	19607.5	19742.7	19744.1		KI-control-1	0.995312	0.995205	0.995204
	KI-control-2	24852.1	25144.7	25147.6		KI-control-2	20525.1	20687.8	20689.5		KI-control-2	0.825888	0.822751	0.82272
	KI-control-3	23245.2	23489.6	23492		KI-control-3	18628.7	18734.6	18735.6		KI-control-3	0.801399	0.797569	0.797531
	Mir802 KI-1	22618.5	22844.1	22846.4		Mir802 KI-1	12311.1	12227.4	12226.6		Mir802 KI-1	0.544291	0.535255	0.535165
	Mir802 KI-2	20667.4	20834.4	20836.1		Mir802 KI-2	11712.4	11610.7	11609.7		Mir802 KI-2	0.566707	0.557286	0.557192
	Mir802 KI-3	22546.7	22770.1	22772.4		Mir802 KI-3	12294.9	12210.7	12209.9		Mir802 KI-3	0.545307	0.536261	0.536171
						P52	Area				P52/β-Actin	Area
						KI-control-1	5384.25	5092.77	5089.86		KI-control-1	0.273314	0.25672	0.256556
						KI-control-2	12087.8	11997.5	11996.6		KI-control-2	0.48639	0.477137	0.477046
						KI-control-3	9910.49	9754.8	9753.25		KI-control-3	0.426345	0.415282	0.415172
						Mir802 KI-1	23655.1	23911.7	23914.3		Mir802 KI-1	1.04583	1.04674	1.04674
						Mir802 KI-2	20008	20155.2	20156.7		Mir802 KI-2	0.968092	0.967398	0.967391
						Mir802 KI-3	21061.1	21240	21241.7		Mir802 KI-3	0.93411	0.932799	0.932786
E
	β-Actin	Area				IKK-α	Area				IKK-α/β-Actin	Area
	miR-NC	25746.9	25208.5	25213.9		miR-NC	29067.6	28429.6	28436		miR-NC	1.12897	1.12778	1.12779
	Mir802	25162	24641.2	24646.4		Mir802	29790.8	29131.1	29137.7		Mir802	1.18396	1.18221	1.18223
	Anti-NC	26269.9	25715.8	25721.4		Anti-NC	31657.1	30941.4	30948.6		Anti-NC	1.20507	1.20321	1.20322
	Anti-Mir802	26989.2	26413.5	26419.3		Anti-Mir802	30129.4	29459.5	29466.2		Anti-Mir802	1.11635	1.11532	1.11533
						P-IKK-α	Area				P-IKK-α/β-Actin	Area
						miR-NC	30245.9	29572.5	29579.2		miR-NC	1.17474	1.17311	1.17313
						Mir802	43320.1	42254.5	42265.2		Mir802	1.72165	1.71479	1.71486
						Anti-NC	26780.7	26211.2	26216.9		Anti-NC	1.01944	1.01926	1.01927
						Anti-Mir802	4313.38	4417.97	4416.93		Anti-Mir802	0.159819	0.167262	0.167186
F
	β-Actin	Area				IKK-α	Area				IKK-α/β-Actin	Area
	KI-control-1	21028.3	20631.4	20635.4		KI-control-1	24615.4	24111	24116		KI-control-1	1.17059	1.16865	1.16867
	KI-control-2	21283.9	20879.4	20883.4		KI-control-2	22598.2	22154.3	22158.7		KI-control-2	1.06175	1.06106	1.06107
	KI-control-3	19314	18968.5	18972		KI-control-3	21066.6	20668.6	20672.6		KI-control-3	1.09074	1.08963	1.08964
	Mir802 KI-1	19144.9	18804.6	18808		Mir802 KI-1	20039.5	19672.3	19676		Mir802 KI-1	1.04673	1.04614	1.04615
	Mir802 KI-2	21608.6	21194.4	21198.5		Mir802 KI-2	20350.2	19973.7	19977.5		Mir802 KI-2	0.941766	0.942409	0.942402
	Mir802 KI-3	21893.7	21470.9	21475.1		Mir802 KI-3	20379.8	20002.4	20006.2		Mir802 KI-3	0.930851	0.931605	0.931597
						P-IKK-α	Area				P-IKK-α/β-Actin	Area
						KI-control-1	16351.4	16094.9	16097.4		KI-control-1	0.777591	0.780114	0.780088
						KI-control-2	15419.5	15190.9	15193.2		KI-control-2	0.724466	0.727554	0.727523
						KI-control-3	14347.5	14151	14153		KI-control-3	0.742855	0.746027	0.745995
						Mir802 KI-1	24238	23744.9	23749.8		Mir802 KI-1	1.26603	1.26272	1.26275
						Mir802 KI-2	22325.5	21889.7	21894.1		Mir802 KI-2	1.03318	1.03281	1.03281
						Mir802 KI-3	23289	22824.3	22829		Mir802 KI-3	1.06373	1.06304	1.06304
G
	β-Actin	Area				P100	Area				P100/β-Actin	Area
	Control	34475.3	33675	33683.1		Control	29800.9	29140.9	29147.5		Control	0.864413	0.865355	0.865345
	Mir802	34206.5	33414.3	33422.2		Mir802	17929.7	17625.8	17628.9		Mir802	0.524162	0.527494	0.52746
	oe-Traf3	32430.3	31691.4	31698.7		oe-Traf3	36158.4	35307.7	35316.2		oe-Traf3	1.11496	1.11411	1.11412
	Mir802 & oe-Traf3	33084.8	32326.2	32333.8		Mir802 & oe-Traf3	29016.9	28380.4	28386.8		Mir802 & oe-Traf3	0.877048	0.877938	0.877929
						P52	Area				P52/β-Actin	Area
						Control	28473.9	27853.7	27859.9		Control	0.825921	0.82713	0.827118
						Mir802	44667.7	43561.7	43572.8		Mir802	1.30583	1.30369	1.30371
						oe-Traf3	18151.1	17840.6	17843.7		oe-Traf3	0.559697	0.562948	0.562915
						Mir802 & oe-Traf3	28827.7	28196.8	28203.2		Mir802 & oe-Traf3	0.871328	0.872259	0.872249
						NIK	Area				NIK/β-Actin	Area
						Control	28865.7	28233.8	28240.1		Control	0.837287	0.838418	0.838406
						Mir802	37939.2	37035.1	37044.1		Mir802	1.10912	1.10836	1.10837
						oe-Traf3	18357.4	18040.7	18043.9		oe-Traf3	0.566059	0.569263	0.56923
						Mir802 & oe-Traf3	29500.9	28849.9	28856.4		Mir802 & oe-Traf3	0.891676	0.89246	0.892452
						IKK-α	Area				IKK-α/β-Actin	Area
						Control	42894.9	41842.1	41852.6		Control	1.24422	1.24252	1.24254
						Mir802	38969.6	38034.5	38043.8		Mir802	1.13925	1.13827	1.13828
						oe-Traf3	38473.4	37553.2	37562.4		oe-Traf3	1.18634	1.18497	1.18498
						Mir802 & oe-Traf3	40863.7	39871.7	39881.7		Mir802 & oe-Traf3	1.23512	1.23342	1.23344
						P-IKK-α	Area				P-IKK-α/β-Actin	Area
						Control	28214.5	27602.1	27608.2		Control	0.818398	0.81966	0.819647
						Mir802	42160.4	41129.6	41139.9		Mir802	1.23253	1.2309	1.23092
						oe-Traf3	14281.8	14087.3	14089.2		oe-Traf3	0.440384	0.444516	0.444473
						Mir802 & oe-Traf3	25208.8	24686.6	24691.8		Mir802 & oe-Traf3	0.761947	0.76367	0.763653
H
	β-Actin	Area				P100	Area				P100/β-Actin	Area
	Control-1	14388.4	14190.8	14192.7		Control-1	14789	14579.3	14581.4		Control-1	1.02784	1.02738	1.02739
	Control-2	13721.3	13543.7	13545.4		Control-2	13219.6	13057	13058.6		Control-2	0.963436	0.964068	0.964061
	Control-3	12694.8	12548	12549.5		Control-3	12812.7	12662.3	12663.8		Control-3	1.00929	1.00911	1.00911
	Mir802 KI-1	12983.4	12827.9	12829.4		Mir802 KI-1	9411.84	9363.49	9363.97		Mir802 KI-1	0.724915	0.729933	0.729882
	Mir802 KI-2	12012.8	11886.5	11887.7		Mir802 KI-2	8765.72	8736.75	8737.04		Mir802 KI-2	0.729696	0.735017	0.734963
	Mir802 KI-3	12978.3	12822.9	12824.5		Mir802 KI-3	9372.01	9324.85	9325.32		Mir802 KI-3	0.722132	0.727203	0.727151
	Traf3 eWAT OE-1	12909.1	12755.9	12757.4		Traf3 eWAT OE-1	16684.7	16418.2	16420.8		Traf3 eWAT OE-1	1.29247	1.28711	1.28716
	Traf3 eWAT OE-2	13531	13359	13360.8		Traf3 eWAT OE-2	18263.8	17949.9	17953.1		Traf3 eWAT OE-2	1.34978	1.34365	1.34372
	Traf3 eWAT OE-3	12344	12207.7	12209.1		Traf3 eWAT OE-3	17187.6	16906	16908.8		Traf3 eWAT OE-3	1.39238	1.38486	1.38494
	Mir802 KI & Traf3 eWAT OE-1	13545.7	13373.3	13375.1		Mir802 KI & Traf3 eWAT OE-1	13320.7	13155.1	13156.8		Mir802 KI & Traf3 eWAT OE-1	0.98339	0.98368	0.983677
	Mir802 KI & Traf3 eWAT OE-2	13631.8	13456.9	13458.6		Mir802 KI & Traf3 eWAT OE-2	13562.7	13389.8	13391.6		Mir802 KI & Traf3 eWAT OE-2	0.994929	0.995018	0.995017
	Mir802 KI & Traf3 eWAT OE-3	13250.4	13086.9	13088.5		Mir802 KI & Traf3 eWAT OE-3	12120.5	11990.9	11992.2		Mir802 KI & Traf3 eWAT OE-3	0.914729	0.916254	0.916238
						P52	Area				P52/β-Actin	Area
						Control-1	15215.1	14992.7	14994.9		Control-1	1.05746	1.05651	1.05652
						Control-2	12882.7	12730.2	12731.8		Control-2	0.938884	0.93994	0.93993
						Control-3	11963.4	11838.5	11839.8		Control-3	0.942385	0.943459	0.943448
						Mir802 KI-1	17261.4	16977.6	16980.4		Mir802 KI-1	1.3295	1.32349	1.32355
						Mir802 KI-2	15976.1	15730.8	15733.3		Mir802 KI-2	1.32992	1.32343	1.32349
						Mir802 KI-3	16690.1	16423.4	16426.1		Mir802 KI-3	1.28601	1.28079	1.28084
						Traf3 eWAT OE-1	9808.84	9748.58	9749.18		Traf3 eWAT OE-1	0.759837	0.764243	0.764198
						Traf3 eWAT OE-2	11128	11028.2	11029.2		Traf3 eWAT OE-2	0.822411	0.825522	0.82549
						Traf3 eWAT OE-3	9977.13	9911.82	9912.47		Traf3 eWAT OE-3	0.808257	0.811932	0.811895
						Mir802 KI & Traf3 eWAT OE-1	13733.5	13555.5	13557.3		Mir802 KI & Traf3 eWAT OE-1	1.01387	1.01362	1.01363
						Mir802 KI & Traf3 eWAT OE-2	13117.9	12958.4	12959.9		Mir802 KI & Traf3 eWAT OE-2	0.962298	0.962953	0.962947
						Mir802 KI & Traf3 eWAT OE-3	15091.1	14872.4	14874.6		Mir802 KI & Traf3 eWAT OE-3	1.13892	1.13643	1.13646
						NIK	Area				NIK/β-Actin	Area
						Control-1	11022	10925.4	10926.3		Control-1	0.766033	0.769891	0.769852
						Control-2	11213.7	11111.3	11112.3		Control-2	0.817249	0.820406	0.820374
						Control-3	11118.6	11019	11020		Control-3	0.875836	0.878151	0.878128
						Mir802 KI-1	14672.3	14466.1	14468.1		Mir802 KI-1	1.13008	1.12771	1.12773
						Mir802 KI-2	14754.4	14545.8	14547.9		Mir802 KI-2	1.22822	1.22373	1.22377
						Mir802 KI-3	15231.7	15008.8	15011		Mir802 KI-3	1.17363	1.17047	1.1705
						Traf3 eWAT OE-1	6928.31	6954.46	6954.19		Traf3 eWAT OE-1	0.536698	0.545197	0.545111
						Traf3 eWAT OE-2	6861.13	6889.3	6889.02		Traf3 eWAT OE-2	0.507069	0.515703	0.515616
						Traf3 eWAT OE-3	6968.18	6993.14	6992.89		Traf3 eWAT OE-3	0.564499	0.572847	0.572763
						Mir802 KI & Traf3 eWAT OE-1	10730.5	10642.6	10643.5		Mir802 KI & Traf3 eWAT OE-1	0.792173	0.795809	0.795772
						Mir802 KI & Traf3 eWAT OE-2	11324.4	11218.7	11219.8		Mir802 KI & Traf3 eWAT OE-2	0.830733	0.833677	0.833647
						Mir802 KI & Traf3 eWAT OE-3	10527.1	10445.3	10446.1		Mir802 KI & Traf3 eWAT OE-3	0.794475	0.79815	0.798113
						IKK-α	Area				IKK-α/β-Actin	Area
						Control-1	15165.8	14944.8	14947		Control-1	1.05403	1.05314	1.05315
						Control-2	14631.3	14426.3	14428.4		Control-2	1.06632	1.06517	1.06518
						Control-3	15474.4	15244.2	15246.5		Control-3	1.21895	1.21487	1.21491
						Mir802 KI-1	13961.3	13776.4	13778.3		Mir802 KI-1	1.07532	1.07394	1.07396
						Mir802 KI-2	13543.4	13371.1	13372.8		Mir802 KI-2	1.12741	1.1249	1.12493
						Mir802 KI-3	13800.3	13620.3	13622.1		Mir802 KI-3	1.06334	1.06218	1.0622
						Traf3 eWAT OE-1	14466	14266	14268		Traf3 eWAT OE-1	1.1206	1.11839	1.11841
						Traf3 eWAT OE-2	14772	14562.9	14564.9		Traf3 eWAT OE-2	1.09172	1.09011	1.09013
						Traf3 eWAT OE-3	15006.3	14790.1	14792.3		Traf3 eWAT OE-3	1.21567	1.21154	1.21158
						Mir802 KI & Traf3 eWAT OE-1	16205	15952.9	15955.4		Mir802 KI & Traf3 eWAT OE-1	1.19632	1.19288	1.19292
						Mir802 KI & Traf3 eWAT OE-2	16493	16232.2	16234.8		Mir802 KI & Traf3 eWAT OE-2	1.20989	1.20624	1.20627
						Mir802 KI & Traf3 eWAT OE-3	17796.4	17496.5	17499.5		Mir802 KI & Traf3 eWAT OE-3	1.34308	1.33695	1.33701
						P-IKK-α	Area				P-IKK-α/β-Actin	Area
						Control-1	11022.8	10926.1	10927.1		Control-1	0.766087	0.769944	0.769905
						Control-2	9720.13	9662.53	9663.11		Control-2	0.708397	0.713435	0.713384
						Control-3	8856.31	8824.62	8824.93		Control-3	0.69763	0.703269	0.703212
						Mir802 KI-1	16892.8	16620.1	16622.8		Mir802 KI-1	1.30111	1.29562	1.29568
						Mir802 KI-2	17033.1	16756.1	16758.9		Mir802 KI-2	1.41791	1.40968	1.40977
						Mir802 KI-3	16611.7	16347.4	16350		Mir802 KI-3	1.27997	1.27486	1.27491
						Traf3 eWAT OE-1	4529.6	4627.71	4626.73		Traf3 eWAT OE-1	0.350883	0.362791	0.36267
						Traf3 eWAT OE-2	4452.13	4552.57	4551.57		Traf3 eWAT OE-2	0.329033	0.340786	0.340667
						Traf3 eWAT OE-3	4720.72	4813.1	4812.17		Traf3 eWAT OE-3	0.38243	0.394268	0.394148
						Mir802 KI & Traf3 eWAT OE-1	10509.5	10428.3	10429.1		Mir802 KI & Traf3 eWAT OE-1	0.775858	0.779779	0.77974
						Mir802 KI & Traf3 eWAT OE-2	10536.9	10454.8	10455.6		Mir802 KI & Traf3 eWAT OE-2	0.772962	0.77691	0.77687
						Mir802 KI & Traf3 eWAT OE-3	11994.1	11868.3	11869.6		Mir802 KI & Traf3 eWAT OE-3	0.905189	0.906884	0.906867
I
	β-Actin	Area				iNOS	Area				iNOS/β-Actin	Area
	KI-control-1	25375.1	24847.9	24853.1		KI-control-1	14856.1	14644.4	14646.6		KI-control-1	0.58546	0.589364	0.589324
	KI-control-2	25929.4	25385.5	25391		KI-control-2	15127.1	14907.3	14909.5		KI-control-2	0.583395	0.587236	0.587196
	KI-control-3	25605	25070.8	25076.1		KI-control-3	11188.2	11086.5	11087.5		KI-control-3	0.436953	0.442208	0.442154
	Mir802 KI-1	25554.7	25022	25027.3		Mir802 KI-1	24054.7	23567.1	23571.9		Mir802 KI-1	0.941304	0.941853	0.941848
	Mir802 KI-2	25137.1	24617	24622.2		Mir802 KI-2	23179.2	22717.8	22722.4		Mir802 KI-2	0.922109	0.92285	0.922842
	Mir802 KI-3	24028.4	23541.5	23546.4		Mir802 KI-3	25234.2	24711.2	24716.4		Mir802 KI-3	1.05019	1.04969	1.04969
						P65	Area				P65/β-Actin	Area
						KI-control-1	20644.9	20259.5	20263.4		KI-control-1	0.813587	0.815343	0.815325
						KI-control-2	19643.7	19288.4	19292		KI-control-2	0.757584	0.759819	0.759796
						KI-control-3	20443.3	20064	20067.8		KI-control-3	0.798413	0.800294	0.800275
						Mir802 KI-1	20202.9	19830.8	19834.5		Mir802 KI-1	0.790575	0.792534	0.792514
						Mir802 KI-2	21122.9	20723.2	20727.2		Mir802 KI-2	0.840306	0.841824	0.841809
						Mir802 KI-3	22555.6	22112.9	22117.3		Mir802 KI-3	0.938707	0.939316	0.93931
						P-P65	Area				P-P65/β-Actin	Area
						KI-control-1	20542.7	20160.4	20164.2		KI-control-1	0.809559	0.811352	0.811334
						KI-control-2	19819.8	19459.2	19462.8		KI-control-2	0.764374	0.766546	0.766523
						KI-control-3	16628.6	16363.8	16366.4		KI-control-3	0.649431	0.652703	0.652669
						Mir802 KI-1	28484.4	27863.8	27870		Mir802 KI-1	1.11464	1.11357	1.11358
						Mir802 KI-2	26499.6	25938.6	25944.2		Mir802 KI-2	1.0542	1.05369	1.05369
						Mir802 KI-3	26106.2	25557	25562.5		Mir802 KI-3	1.08647	1.08561	1.08562
						Fas	Area				Fas/β-Actin	Area
						KI-control-1	10652.4	10566.8	10567.7		KI-control-1	0.419798	0.425262	0.425206
						KI-control-2	11016.4	10919.9	10920.8		KI-control-2	0.42486	0.430161	0.430107
						KI-control-3	8703.93	8676.82	8677.09		KI-control-3	0.339932	0.346092	0.346029
						Mir802 KI-1	20798.6	20408.7	20412.6		Mir802 KI-1	0.813887	0.815628	0.81561
						Mir802 KI-2	23812.7	23332.3	23337.1		Mir802 KI-2	0.94731	0.947811	0.947806
						Mir802 KI-3	25370.5	24843.4	24848.6		Mir802 KI-3	1.05586	1.0553	1.05531
						IκB-α	Area				IκB-α/β-Actin	Area
						KI-control-1	21690.9	21274.2	21278.3		KI-control-1	0.854809	0.856176	0.856162
						KI-control-2	21960.3	21535.5	21539.8		KI-control-2	0.846927	0.848338	0.848323
						KI-control-3	22872.9	22420.7	22425.2		KI-control-3	0.893299	0.894295	0.894285
						Mir802 KI-1	22314.1	21878.7	21883.1		Mir802 KI-1	0.873192	0.874378	0.874366
						Mir802 KI-2	22109.2	21679.9	21684.2		Mir802 KI-2	0.879544	0.880689	0.880677
						Mir802 KI-3	23068.2	22610.1	22614.7		Mir802 KI-3	0.960039	0.960436	0.960432
						P-IκB-α	Area				P-IκB-α/β-Actin	Area
						KI-control-1	8414.68	8396.24	8396.42		KI-control-1	0.331611	0.337906	0.337842
						KI-control-2	7588.25	7594.6	7594.54		KI-control-2	0.29265	0.29917	0.299104
						KI-control-3	6167.76	6216.73	6216.24		KI-control-3	0.240882	0.247967	0.247894
						Mir802 KI-1	22532.6	22090.6	22095		Mir802 KI-1	0.88174	0.882846	0.882834
						Mir802 KI-2	23768.5	23289.5	23294.3		Mir802 KI-2	0.945555	0.946073	0.946067
						Mir802 KI-3	21517.3	21105.8	21109.9		Mir802 KI-3	0.895496	0.896534	0.896524
						MnSOD	Area				MnSOD/β-Actin	Area
						KI-control-1	5810.88	5870.56	5928.44		KI-control-1	0.228999	0.23626	0.238539
						KI-control-2	7215.54	7233.07	7250.08		KI-control-2	0.278276	0.284929	0.285538
						KI-control-3	6740.83	6772.61	6803.43		KI-control-3	0.263263	0.270139	0.271311
						Mir802 KI-1	20902.5	20509.4	20128.1		Mir802 KI-1	0.817952	0.819655	0.804246
						Mir802 KI-2	21577.1	21163.8	20762.9		Mir802 KI-2	0.858377	0.859723	0.843259
						Mir802 KI-3	26051.8	25504.2	24973.1		Mir802 KI-3	1.08421	1.08337	1.06059
J
	β-Actin	Area				iNOS	Area				iNOS/β-Actin	Area
	Control-1	10855.1	10763.4	10764.3		Control-1	6217.06	6264.55	6264.08		Control-1	0.572734	0.582023	0.581929
	Control-2	10727.9	10640.1	10640.9		Control-2	6836.06	6864.98	6864.69		Control-2	0.637223	0.645202	0.645121
	Control-3	11404.2	11296.1	11297.1		Control-3	6168.94	6217.87	6217.38		Control-3	0.540937	0.550446	0.55035
	Mir802 KI-1	10655.8	10570.1	10571		Mir802 KI-1	11661.4	11545.6	11546.7		Mir802 KI-1	1.09438	1.09229	1.09231
	Mir802 KI-2	10374.1	10296.8	10297.6		Mir802 KI-2	10771.6	10682.5	10683.4		Mir802 KI-2	1.03833	1.03745	1.03746
	Mir802 KI-3	10964.6	10869.7	10870.6		Mir802 KI-3	10391.6	10313.9	10314.6		Mir802 KI-3	0.947741	0.948866	0.948855
	Traf3 eWAT OE-1	10564.2	10481.3	10482.1		Traf3 eWAT OE-1	2854.48	3002.84	3001.36		Traf3 eWAT OE-1	0.270203	0.286496	0.286332
	Traf3 eWAT OE-2	11192.3	11090.5	11091.6		Traf3 eWAT OE-2	2669.65	2823.56	2822.02		Traf3 eWAT OE-2	0.238525	0.254592	0.25443
	Traf3 eWAT OE-3	10683.2	10596.7	10597.6		Traf3 eWAT OE-3	3956.89	4072.18	4071.03		Traf3 eWAT OE-3	0.370385	0.384288	0.384148
	Mir802 KI & Traf3 eWAT OE-1	11221.2	11118.5	11119.6		Mir802 KI & Traf3 eWAT OE-1	8228.43	8215.57	8215.7		Mir802 KI & Traf3 eWAT OE-1	0.733294	0.738907	0.73885
	Mir802 KI & Traf3 eWAT OE-2	10818.9	10728.3	10729.2		Mir802 KI & Traf3 eWAT OE-2	8337.72	8321.59	8321.75		Mir802 KI & Traf3 eWAT OE-2	0.770663	0.775665	0.775615
	Mir802 KI & Traf3 eWAT OE-3	11967.1	11842.1	11843.3		Mir802 KI & Traf3 eWAT OE-3	8361.48	8344.63	8344.8		Mir802 KI & Traf3 eWAT OE-3	0.698708	0.704661	0.704601
						P65	Area				P65/β-Actin	Area
						Control-1	10132.5	10062.5	10063.2		Control-1	0.933433	0.934881	0.934866
						Control-2	12570.9	12427.8	12429.2		Control-2	1.1718	1.16802	1.16806
						Control-3	11866.8	11744.8	11746		Control-3	1.04056	1.03972	1.03973
						Mir802 KI-1	12453.9	12314.3	12315.7		Mir802 KI-1	1.16875	1.16501	1.16505
						Mir802 KI-2	12217.1	12084.6	12085.9		Mir802 KI-2	1.17765	1.17362	1.17366
						Mir802 KI-3	11712.6	11595.2	11596.4		Mir802 KI-3	1.06822	1.06675	1.06677
						Traf3 eWAT OE-1	11329.2	11223.3	11224.4		Traf3 eWAT OE-1	1.07241	1.0708	1.07081
						Traf3 eWAT OE-2	10954.9	10860.2	10861.2		Traf3 eWAT OE-2	0.978788	0.979235	0.979231
						Traf3 eWAT OE-3	10448.5	10369	10369.8		Traf3 eWAT OE-3	0.97803	0.978515	0.97851
						Mir802 KI & Traf3 eWAT OE-1	11057.5	10959.8	10960.7		Mir802 KI & Traf3 eWAT OE-1	0.985411	0.985718	0.985715
						Mir802 KI & Traf3 eWAT OE-2	11688	11571.4	11572.5		Mir802 KI & Traf3 eWAT OE-2	1.08033	1.07858	1.0786
						Mir802 KI & Traf3 eWAT OE-3	11112.2	11012.8	11013.8		Mir802 KI & Traf3 eWAT OE-3	0.928564	0.929976	0.929961
						P-P65	Area				P-P65/β-Actin	Area
						Control-1	10073.3	10005.1	10005.8		Control-1	0.927982	0.929548	0.929532
						Control-2	11314.2	11208.8	11209.8		Control-2	1.05465	1.05345	1.05346
						Control-3	10443.2	10363.9	10364.7		Control-3	0.915733	0.917478	0.917461
						Mir802 KI-1	15709.8	15472.5	15474.8		Mir802 KI-1	1.4743	1.4638	1.4639
						Mir802 KI-2	15782.1	15542.6	15545		Mir802 KI-2	1.5213	1.50945	1.50957
						Mir802 KI-3	16106.3	15857.1	15859.6		Mir802 KI-3	1.46894	1.45884	1.45894
						Traf3 eWAT OE-1	3804.36	3924.22	3923.03		Traf3 eWAT OE-1	0.360118	0.374404	0.37426
						Traf3 eWAT OE-2	3910.01	4026.71	4025.54		Traf3 eWAT OE-2	0.349348	0.363076	0.362938
						Traf3 eWAT OE-3	4684.23	4777.71	4776.77		Traf3 eWAT OE-3	0.438468	0.450868	0.450743
						Mir802 KI & Traf3 eWAT OE-1	11882.6	11760.1	11761.3		Mir802 KI & Traf3 eWAT OE-1	1.05894	1.0577	1.05772
						Mir802 KI & Traf3 eWAT OE-2	12682.3	12535.8	12537.3		Mir802 KI & Traf3 eWAT OE-2	1.17224	1.16848	1.16852
						Mir802 KI & Traf3 eWAT OE-3	11374.6	11267.4	11268.4		Mir802 KI & Traf3 eWAT OE-3	0.950492	0.95147	0.951461
						Fas	Area				Fas/β-Actin	Area
						Control-1	5256.18	5332.5	5331.74		Control-1	0.484215	0.495428	0.495315
						Control-2	5102.43	5093.35	5093.44		Control-2	0.475622	0.478696	0.478665
						Control-3	4861.18	4949.35	4948.47		Control-3	0.426263	0.438148	0.438028
						Mir802 KI-1	12659.1	12513.4	12514.8		Mir802 KI-1	1.18801	1.18385	1.18389
						Mir802 KI-2	14008	13821.8	13823.6		Mir802 KI-2	1.35029	1.34233	1.34241
						Mir802 KI-3	15253	15029.4	15031.6		Mir802 KI-3	1.39111	1.38269	1.38278
						Traf3 eWAT OE-1	3290.6	3425.88	3424.53		Traf3 eWAT OE-1	0.311486	0.326858	0.326703
						Traf3 eWAT OE-2	3846.01	3964.63	3963.45		Traf3 eWAT OE-2	0.34363	0.357479	0.357339
						Traf3 eWAT OE-3	3363.01	3496.12	3494.79		Traf3 eWAT OE-3	0.314795	0.329926	0.329773
						Mir802 KI & Traf3 eWAT OE-1	8388.55	8370.89	8371.07		Mir802 KI & Traf3 eWAT OE-1	0.747564	0.752876	0.752823
						Mir802 KI & Traf3 eWAT OE-2	6980.13	7004.73	7004.48		Mir802 KI & Traf3 eWAT OE-2	0.64518	0.652919	0.652841
						Mir802 KI & Traf3 eWAT OE-3	6061.06	6113.23	6112.71		Mir802 KI & Traf3 eWAT OE-3	0.506479	0.516231	0.516132
						IκB-α	Area				IκB-α/β-Actin	Area
						Control-1	11244.5	11141.1	11142.2		Control-1	1.03587	1.03509	1.0351
						Control-2	12998.9	12842.9	12844.5		Control-2	1.21169	1.20704	1.20708
						Control-3	13713	13535.6	13537.4		Control-3	1.20245	1.19826	1.1983
						Mir802 KI-1	12494.1	12353.2	12354.6		Mir802 KI-1	1.17252	1.1687	1.16874
						Mir802 KI-2	13559.9	13387.1	13388.8		Mir802 KI-2	1.3071	1.30012	1.30019
						Mir802 KI-3	14815	14604.6	14606.7		Mir802 KI-3	1.35117	1.34361	1.34368
						Traf3 eWAT OE-1	13102.8	12943.7	12945.3		Traf3 eWAT OE-1	1.2403	1.23494	1.23499
						Traf3 eWAT OE-2	11666.4	11550.4	11551.5		Traf3 eWAT OE-2	1.04235	1.04146	1.04147
						Traf3 eWAT OE-3	12343.5	12207.2	12208.5		Traf3 eWAT OE-3	1.15541	1.15198	1.15201
						Mir802 KI & Traf3 eWAT OE-1	11100	11001	11002		Mir802 KI & Traf3 eWAT OE-1	0.989201	0.989429	0.989426
						Mir802 KI & Traf3 eWAT OE-2	11847.8	11726.3	11727.6		Mir802 KI & Traf3 eWAT OE-2	1.0951	1.09303	1.09305
						Mir802 KI & Traf3 eWAT OE-3	11253.9	11150.3	11151.4		Mir802 KI & Traf3 eWAT OE-3	0.94041	0.941587	0.941575
						P-IκB-α	Area				P-IκB-α/β-Actin	Area
						Control-1	8373.65	8356.44	8356.61		Control-1	0.771405	0.776375	0.776325
						Control-2	9093.18	9054.39	9054.78		Control-2	0.847621	0.850972	0.850938
						Control-3	9074.41	9036.17	9036.56		Control-3	0.795708	0.79994	0.799898
						Mir802 KI-1	14145.3	13954.9	13956.8		Mir802 KI-1	1.32748	1.32023	1.3203
						Mir802 KI-2	15183.9	14962.4	14964.6		Mir802 KI-2	1.46364	1.4531	1.45321
						Mir802 KI-3	16711.5	16444.2	16446.9		Mir802 KI-3	1.52414	1.51285	1.51297
						Traf3 eWAT OE-1	5146.35	5225.96	5225.17		Traf3 eWAT OE-1	0.487151	0.498601	0.498485
						Traf3 eWAT OE-2	4371.48	4474.33	4473.3		Traf3 eWAT OE-2	0.390579	0.403437	0.403307
						Traf3 eWAT OE-3	3986.53	4100.93	4099.79		Traf3 eWAT OE-3	0.373159	0.387001	0.386862
						Mir802 KI & Traf3 eWAT OE-1	9672.43	9616.25	9616.81		Mir802 KI & Traf3 eWAT OE-1	0.861979	0.864884	0.864855
						Mir802 KI & Traf3 eWAT OE-2	7669.35	7673.27	7673.24		Mir802 KI & Traf3 eWAT OE-2	0.708886	0.715235	0.715171
						Mir802 KI & Traf3 eWAT OE-3	6853.18	6881.59	6881.3		Mir802 KI & Traf3 eWAT OE-3	0.572671	0.581115	0.581029
						MnSOD	Area				MnSOD/β-Actin	Area
						Control-1	5681.77	5745.32	5744.68		Control-1	0.523421	0.533782	0.533678
						Control-2	5663.48	5727.57	5726.93		Control-2	0.527921	0.538303	0.538198
						Control-3	4551.96	4649.4	4648.43		Control-3	0.399148	0.411595	0.41147
						Mir802 KI-1	14613.1	14408.7	14410.8		Mir802 KI-1	1.37138	1.36316	1.36324
						Mir802 KI-2	10897.8	10804.9	10805.8		Mir802 KI-2	1.05049	1.04934	1.04935
						Mir802 KI-3	13866.7	13684.7	13686.5		Mir802 KI-3	1.26468	1.25898	1.25904
						Traf3 eWAT OE-1	3012.55	3156.17	3154.74		Traf3 eWAT OE-1	0.285166	0.301125	0.300964
						Traf3 eWAT OE-2	3228.72	3365.86	3364.49		Traf3 eWAT OE-2	0.288477	0.303489	0.303338
						Traf3 eWAT OE-3	2747.48	2899.05	2897.54		Traf3 eWAT OE-3	0.257178	0.273581	0.273416
						Mir802 KI & Traf3 eWAT OE-1	5247.31	5323.89	5323.12		Mir802 KI & Traf3 eWAT OE-1	0.467625	0.478829	0.478716
						Mir802 KI & Traf3 eWAT OE-2	6121.84	6172.19	6171.68		Mir802 KI & Traf3 eWAT OE-2	0.565847	0.575317	0.575221
						Mir802 KI & Traf3 eWAT OE-3	4771.48	4862.33	4861.42		Mir802 KI & Traf3 eWAT OE-3	0.398717	0.410599	0.410479

## Sheet: Figure 6- figure supplement 1
B
	β-Actin	Area				TRAF3	Area				TRAF3/β-Actin	Area
	KO-control-1	22186.5	22510.1	22513.3		KO-control-1	14653.7	14751.3	14752.3		KO-control-1	0.660479	0.655321	0.65527
	KO-control-2	21393.2	21693	21696		KO-control-2	16427.3	16578.1	16579.6		KO-control-2	0.767873	0.764213	0.764177
	KO-control-3	23611.4	23977.7	23981.4		KO-control-3	16523.3	16677	16678.5		KO-control-3	0.699803	0.695521	0.695479
	Mir802 KO-1	24835.2	25238.3	25242.3		Mir802 KO-1	28264.5	28770.5	28775.5		Mir802 KO-1	1.13808	1.13996	1.13997
	Mir802 KO-2	26178.5	26621.9	26626.3		Mir802 KO-2	25699	26127.9	26132.2		Mir802 KO-2	0.98168	0.981445	0.981443
	Mir802 KO-3	24277.7	24664	24667.9		Mir802 KO-3	22210	22534.3	22537.5		Mir802 KO-3	0.914829	0.913648	0.913636
						NIK	Area				NIK/β-Actin	Area
						KO-control-1	23081.2	23431.6	23435.1		KO-control-1	1.04033	1.04094	1.04095
						KO-control-2	21641.4	21948.7	21951.7		KO-control-2	1.0116	1.01178	1.01179
						KO-control-3	20589.1	20864.8	20867.6		KO-control-3	0.872001	0.870175	0.870157
						Mir802 KO-1	14040.3	14119.6	14120.3		Mir802 KO-1	0.565341	0.559451	0.559393
						Mir802 KO-2	14124.7	14206.5	14207.3		Mir802 KO-2	0.539553	0.533638	0.53358
						Mir802 KO-3	15020.5	15129.1	15130.2		Mir802 KO-3	0.618695	0.613407	0.613355
C
	β-Actin	Area				P100	Area				P100/β-Actin	Area
	KO-control-1	26442.2	26893.5	26898		KO-control-1	15099.1	15210.1	15211.2		KO-control-1	0.571023	0.565568	0.565514
	KO-control-2	24324.2	24712	24715.9		KO-control-2	13028.7	13077.5	13078		KO-control-2	0.535624	0.529198	0.529134
	KO-control-3	23798.1	24170	24173.8		KO-control-3	16495.7	16648.6	16650.1		KO-control-3	0.693152	0.688811	0.688768
	Mir802 KO-1	23420.8	23781.4	23785		Mir802 KO-1	22000.5	22318.6	22321.7		Mir802 KO-1	0.93936	0.938488	0.938479
	Mir802 KO-2	24385.5	24775.1	24779		Mir802 KO-2	24050.9	24430.4	24434.2		Mir802 KO-2	0.986277	0.986088	0.986086
	Mir802 KO-3	22329	22656.9	22660.2		Mir802 KO-3	20929.1	21215	21217.9		Mir802 KO-3	0.937307	0.93636	0.936351
						P52	Area				P52/β-Actin	Area
						KO-control-1	21207	21501.2	21504.1		KO-control-1	0.80201	0.799492	0.799468
						KO-control-2	24738.1	25138.2	25142.2		KO-control-2	1.01701	1.01725	1.01725
						KO-control-3	21698.7	22007.6	22010.7		KO-control-3	0.911781	0.910533	0.91052
						Mir802 KO-1	12181.4	12204.8	12205		Mir802 KO-1	0.520109	0.513208	0.51314
						Mir802 KO-2	13680.5	13748.9	13749.6		Mir802 KO-2	0.561008	0.554948	0.554889
						Mir802 KO-3	8748.3	8668.74	8667.95		Mir802 KO-3	0.391791	0.38261	0.382519
D
	β-Actin	Area				IKK-α	Area				IKK-α/β-Actin	Area
	KO-control-1	23996.7	24374.6	24378.3		KO-control-1	22590.6	22926.3	22929.7		KO-control-1	0.941406	0.940583	0.940575
	KO-control-2	24996.8	25404.7	25408.8		KO-control-2	24831.7	25234.6	25238.6		KO-control-2	0.993392	0.993303	0.993302
	KO-control-3	24995.7	25403.6	25407.7		KO-control-3	23252.8	23608.4	23612		KO-control-3	0.930273	0.929334	0.929325
	miR-802 KO-1	22367.4	22696.4	22699.7		miR-802 KO-1	23899.6	24274.6	24278.3		miR-802 KO-1	1.0685	1.06953	1.06954
	miR-802 KO-2	22933.2	23279.2	23282.7		miR-802 KO-2	21708.1	22017.3	22020.4		miR-802 KO-2	0.946578	0.945793	0.945785
	miR-802 KO-3	22550.2	22884.7	22888		miR-802 KO-3	18335.8	18543.9	18545.9		miR-802 KO-3	0.81311	0.810317	0.810289
						P-IKK-α	Area				P-IKK-α/β-Actin	Area
						KO-control-1	23699.4	24068.3	24072		KO-control-1	0.987611	0.987437	0.987436
						KO-control-2	22714.8	23054.3	23057.7		KO-control-2	0.908708	0.907479	0.907467
						KO-control-3	21808.8	22121.1	22124.2		KO-control-3	0.872503	0.870787	0.87077
						miR-802 KO-1	14099.6	14180.6	14181.4		miR-802 KO-1	0.630363	0.624793	0.624738
						miR-802 KO-2	14368.2	14457.3	14458.2		miR-802 KO-2	0.626525	0.621039	0.620984
						miR-802 KO-3	12880.1	12924.5	12925		miR-802 KO-3	0.571176	0.564767	0.564704

## Sheet: Figure 7
B
	β-Actin	Area				p-SREBP1	Area				p-SREBP1/β-Actin	Area
	miR-NC	27168.2	26109.8	26127.5		miR-NC	17107.1	16551.7	16561		miR-NC	0.629672	0.633927	0.633853
	Mir802	34565.8	33137.5	33161.3		Mir802	12469.1	12145.6	12151		Mir802	0.360735	0.366522	0.366422
	Anti-NC	30648.5	29416.1	29436.6		Anti-NC	19990.8	19291.2	19302.9		Anti-NC	0.65226	0.655806	0.655745
	Anti-Mir802	29076.1	27922.3	27941.6		Anti-Mir802	36075.6	34571.8	34596.9		Anti-Mir802	1.24073	1.23814	1.23819
						m-SREBP1	Area				m-SREBP1/β-Actin	Area
						miR-NC	17103.7	16548.5	16557.8		miR-NC	0.629548	0.633804	0.63373
						Mir802	35131.3	33674.7	33699		Mir802	1.01636	1.01621	1.01621
						Anti-NC	17517.8	16941.9	16951.5		Anti-NC	0.571571	0.57594	0.575864
						Anti-Mir802	10646.8	10414.5	10418.4		Anti-Mir802	0.366171	0.372981	0.372863
C
	β-Actin	Area				p-SREBP1	Area				p-SREBP1/β-Actin	Area
	KI-control-1	26461	25438	25455		KI-control-1	21220.1	20459.1	20471.8		KI-control-1	0.80194	0.804275	0.804235
	KI-control-2	25101.8	24146.7	24162.7		KI-control-2	20361	19642.9	19654.9		KI-control-2	0.811135	0.813481	0.813441
	KI-control-3	25044.8	24092.5	24108.4		KI-control-3	19340.4	18673.4	18684.5		KI-control-3	0.772233	0.77507	0.77502
	Mir802 KI-1	24794.1	23854.4	23870.1		Mir802 KI-1	11893.8	11599.1	11604		Mir802 KI-1	0.479702	0.486245	0.486132
	Mir802 KI-2	25520.2	24544.2	24560.5		Mir802 KI-2	10954.6	10706.9	10711		Mir802 KI-2	0.429252	0.436228	0.436107
	Mir802 KI-3	24529.3	23602.9	23618.3		Mir802 KI-3	9537.42	9360.55	9363.49		Mir802 KI-3	0.388817	0.396585	0.396451
						m-SREBP1	Area				m-SREBP1/β-Actin	Area
						KI-control-1	5133.83	5177.14	5176.42		KI-control-1	0.194015	0.20352	0.203356
						KI-control-2	7601.25	7521.18	7522.52		KI-control-2	0.302816	0.311478	0.311328
						KI-control-3	5732	5745.4	5745.18		KI-control-3	0.22887	0.238472	0.238306
						Mir802 KI-1	20244.9	19532.7	19544.5		Mir802 KI-1	0.81652	0.818828	0.818788
						Mir802 KI-2	18789.8	18150.3	18161		Mir802 KI-2	0.736272	0.739495	0.739439
						Mir802 KI-3	22519	21693	21706.8		Mir802 KI-3	0.918042	0.919084	0.919066
D
	β-Actin	Area				p-SREBP1	Area				p-SREBP1/β-Actin	Area
	Control	34401.6	32981.5	33005.2		Control	22219.9	21408.9	21422.4		Control	0.645897	0.649118	0.649062
	Mir802	36348.7	34831.3	34856.6		Mir802	13037.2	12685.3	12691.2		Mir802	0.35867	0.364193	0.364097
	oe-Traf3	38476.3	36852.5	36879.6		oe-Traf3	36491.1	34966.6	34992		oe-Traf3	0.948405	0.948825	0.948818
	Mir802 & oe-Traf3	32410.6	31090	31112		Mir802 & oe-Traf3	22727.4	21891.1	21905		Mir802 & oe-Traf3	0.701236	0.704118	0.704068
						m-SREBP1	Area				m-SREBP1/β-Actin	Area
						Control	16844	16301.8	16310.8		Control	0.489629	0.494271	0.49419
						Mir802	34357.7	32939.8	32963.4		Mir802	0.945223	0.945695	0.945687
						oe-Traf3	10595.5	10365.7	10369.5		oe-Traf3	0.275376	0.281275	0.281172
						Mir802 & oe-Traf3	17397.6	16827.7	16837.2		Mir802 & oe-Traf3	0.536787	0.541256	0.541179
H
	β-Actin	Area			B2	pulldown-P65	Area				pulldown-P65/β-Actin	Area
	miR-NC	36410	35860.9	35881.1		miR-NC	22699.6	23658.7	23623.5		miR-NC	0.623444	0.659734	0.658383	0.715571	0.746591	0.745452
	Mir802	30483.6	30586.4	30582.6		Mir802	36874.5	36274.3	36296.3		Mir802	1.20965	1.18596	1.18683	1.64925	1.55318	1.55655
	Anti-NC	33699.4	33448.4	33457.6		Anti-NC	24480.2	25243.4	25215.4		Anti-NC	0.72643	0.754696	0.753653	0.943763	0.951085	0.950823
	Anti-Mir802	33237.9	33037.7	33045.1		Anti-Mir802	4912.3	4827.94	4831.04		Anti-Mir802	0.147792	0.146134	0.146195	0.174547	0.169381	0.169568
					B2	INPUT-P65	Area				INPUT-P65/β-Actin	Area
						miR-NC	31722.4	31688.9	31690.2		miR-NC	0.871254	0.883662	0.8832
						Mir802	22358.3	23354.9	23318.3		Mir802	0.733453	0.76357	0.76247
						Anti-NC	25939	26541.7	26519.6		Anti-NC	0.769717	0.793511	0.792632
						Anti-Mir802	28143.1	28503.4	28490.2		Anti-Mir802	0.846718	0.862752	0.862161
	β-Actin	Area			B1	pulldown-P65	Area				pulldown-P65/β-Actin	Area
	miR-NC	28900.9	29177.8	29167.7		miR-NC	24633.1	25379.5	25352.1		miR-NC	0.85233	0.869821	0.869185
	Mir802	35759.2	35281.7	35299.2		Mir802	28461.7	28786.9	28775		Mir802	0.795927	0.815917	0.815174
	Anti-NC	40008.7	39063.8	39098.4		Anti-NC	32703.3	32561.9	32567.1		Anti-NC	0.817404	0.833558	0.832952
	Anti-Mir802	41661.6	40534.8	40576.1		Anti-Mir802	33375.5	33160.2	33168.1		Anti-Mir802	0.801111	0.818068	0.81743
I
	β-Actin	Area			B2	pulldown-P65	Area				pulldown-P65/β-Actin	Area
	WT-B2 Probe	41849.8	40702.4	40744.4		WT-B2 Probe	31392.8	31395.6	31395.5		WT-B2 Probe	0.750129	0.771345	0.770546	0.898868	0.908987	0.908612
	MUT-B2 Probe	44346.7	42924.5	42976.7		MUT-B2 Probe	0	0	0		MUT-B2 Probe	0	0	0
					B2	INPUT-P65	Area				INPUT-P65/β-Actin	Area
						WT-B2 Probe	34924.8	34539.1	34553.2		WT-B2 Probe	0.834527	0.848577	0.848048
						MUT-B2 Probe	28783.7	29073.5	29062.9		MUT-B2 Probe	0.649062	0.677317	0.676248
	β-Actin	Area			B1	pulldown-P65	Area				pulldown-P65/β-Actin	Area
	WT-B1 Probe	48946.7	47018.6	47089.3		WT-B1 Probe	53703.8	51252.4	51342.3		WT-B1 Probe	1.09719	1.09005	1.09032
	MUT-B1 Probe	48451.5	46577.8	46646.5		MUT-B1 Probe	49573.7	47576.6	47649.8		MUT-B1 Probe	1.02316	1.02144	1.02151
