# Supplementary figures and images for: Adipocyte microRNA-802 promotes adipose tissue inflammation and insulin resistance by modulating macrophages in obesity
Source: eLife journal article supplement (doi:10.7554/elife.99162), 2024-11-26

Figure 5-figure supplement 1

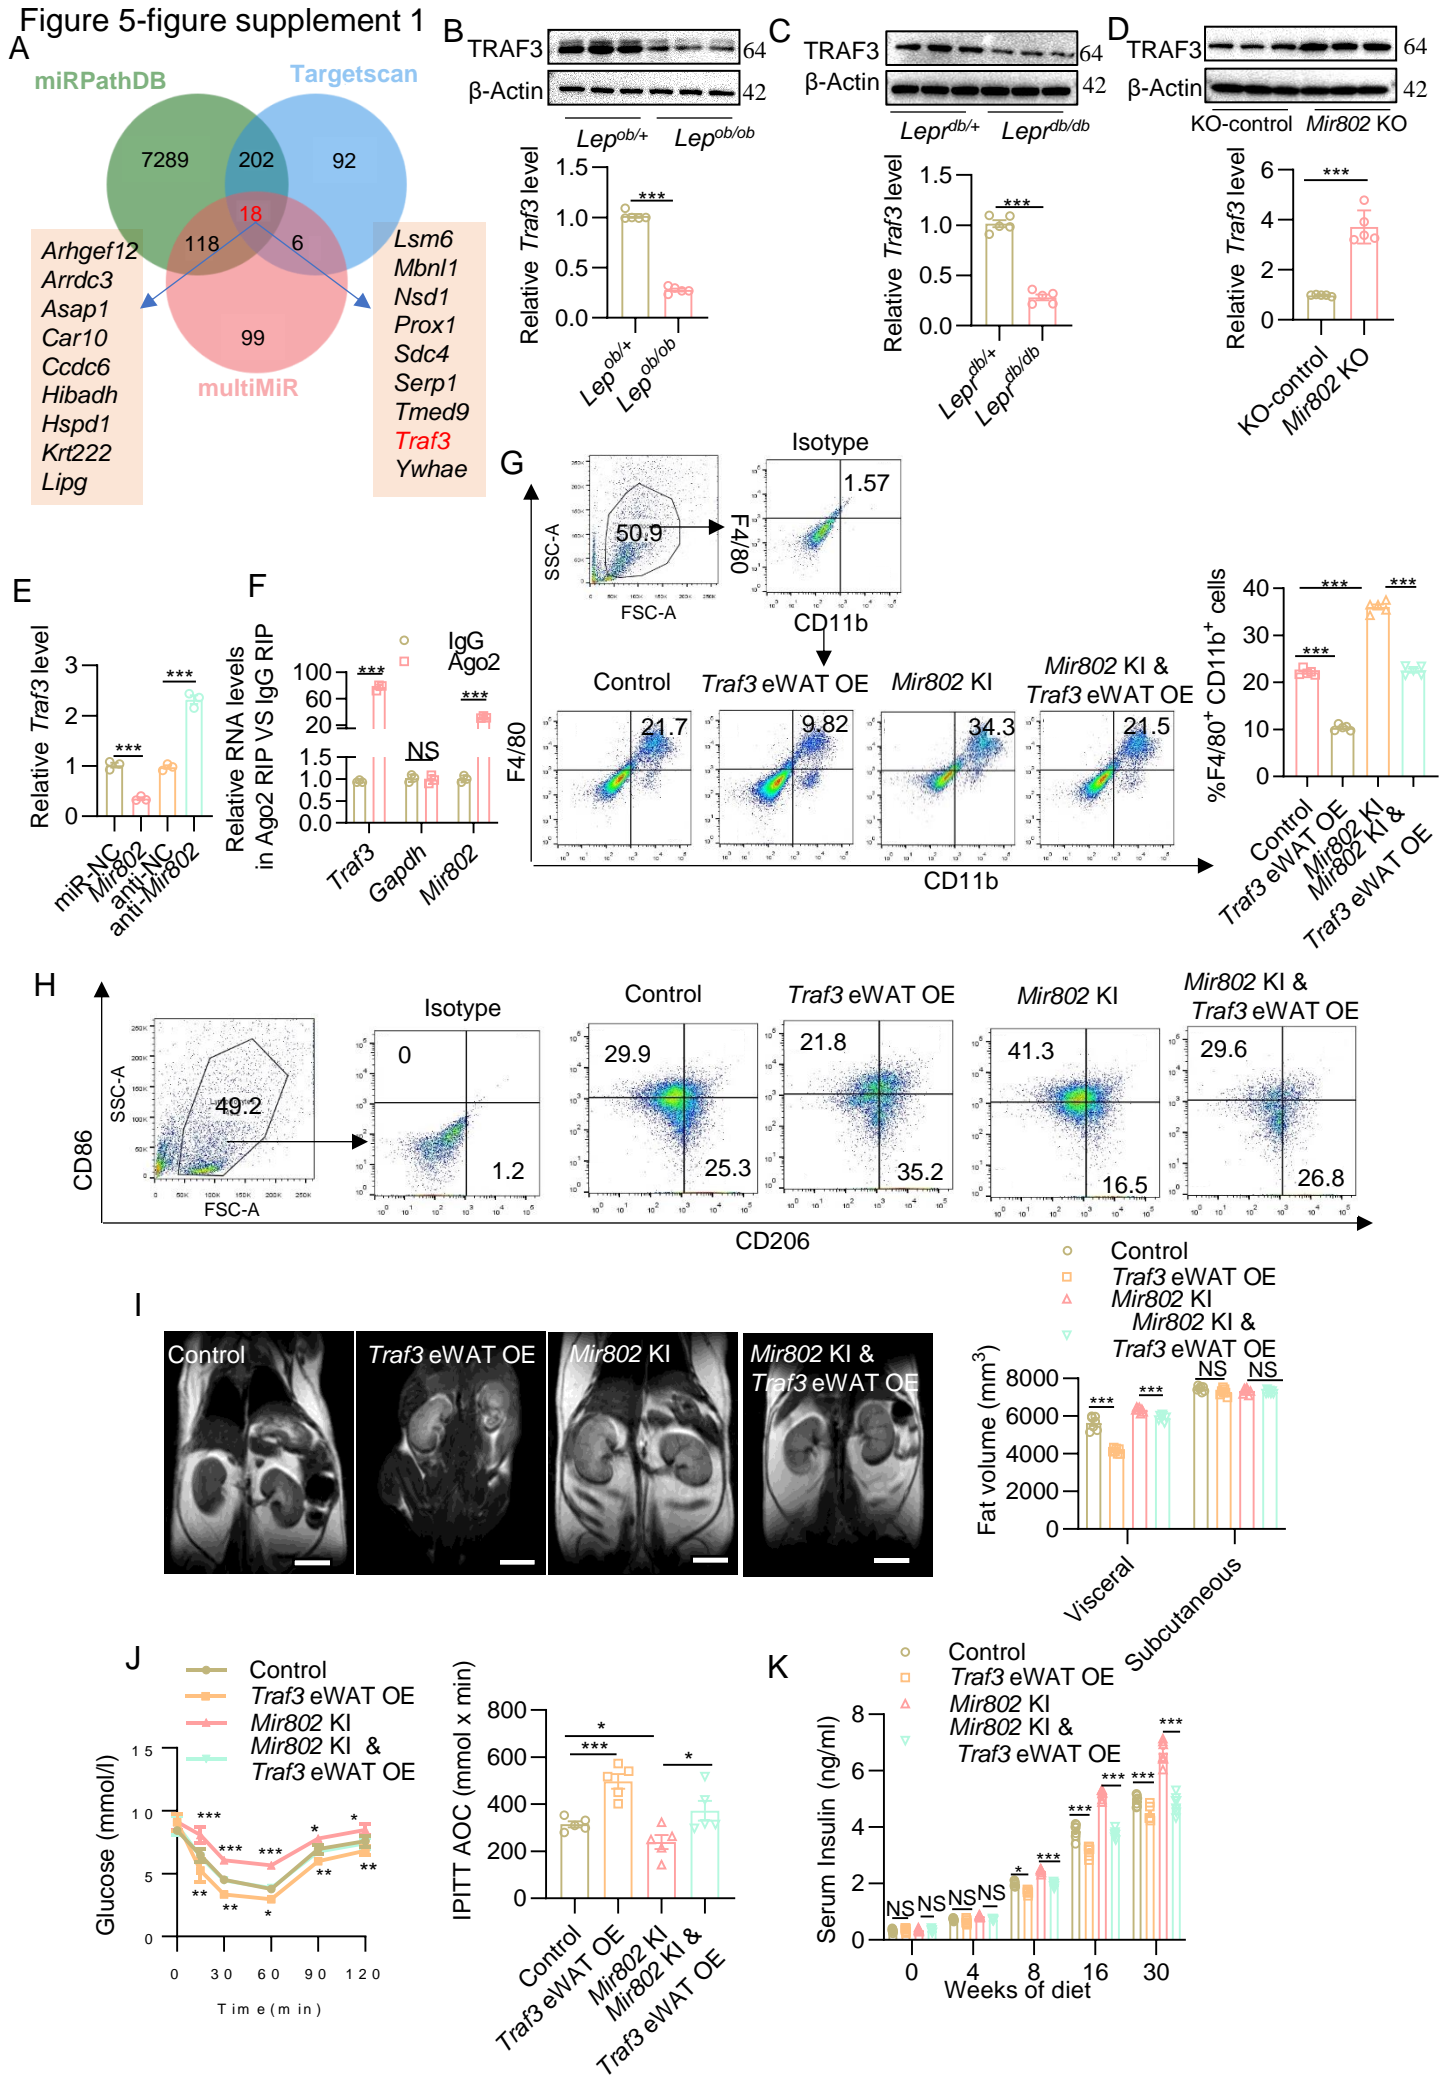

Supplement: supp [file elife-99162-supp-v1.zip]

Figure 3-figure supplement 2

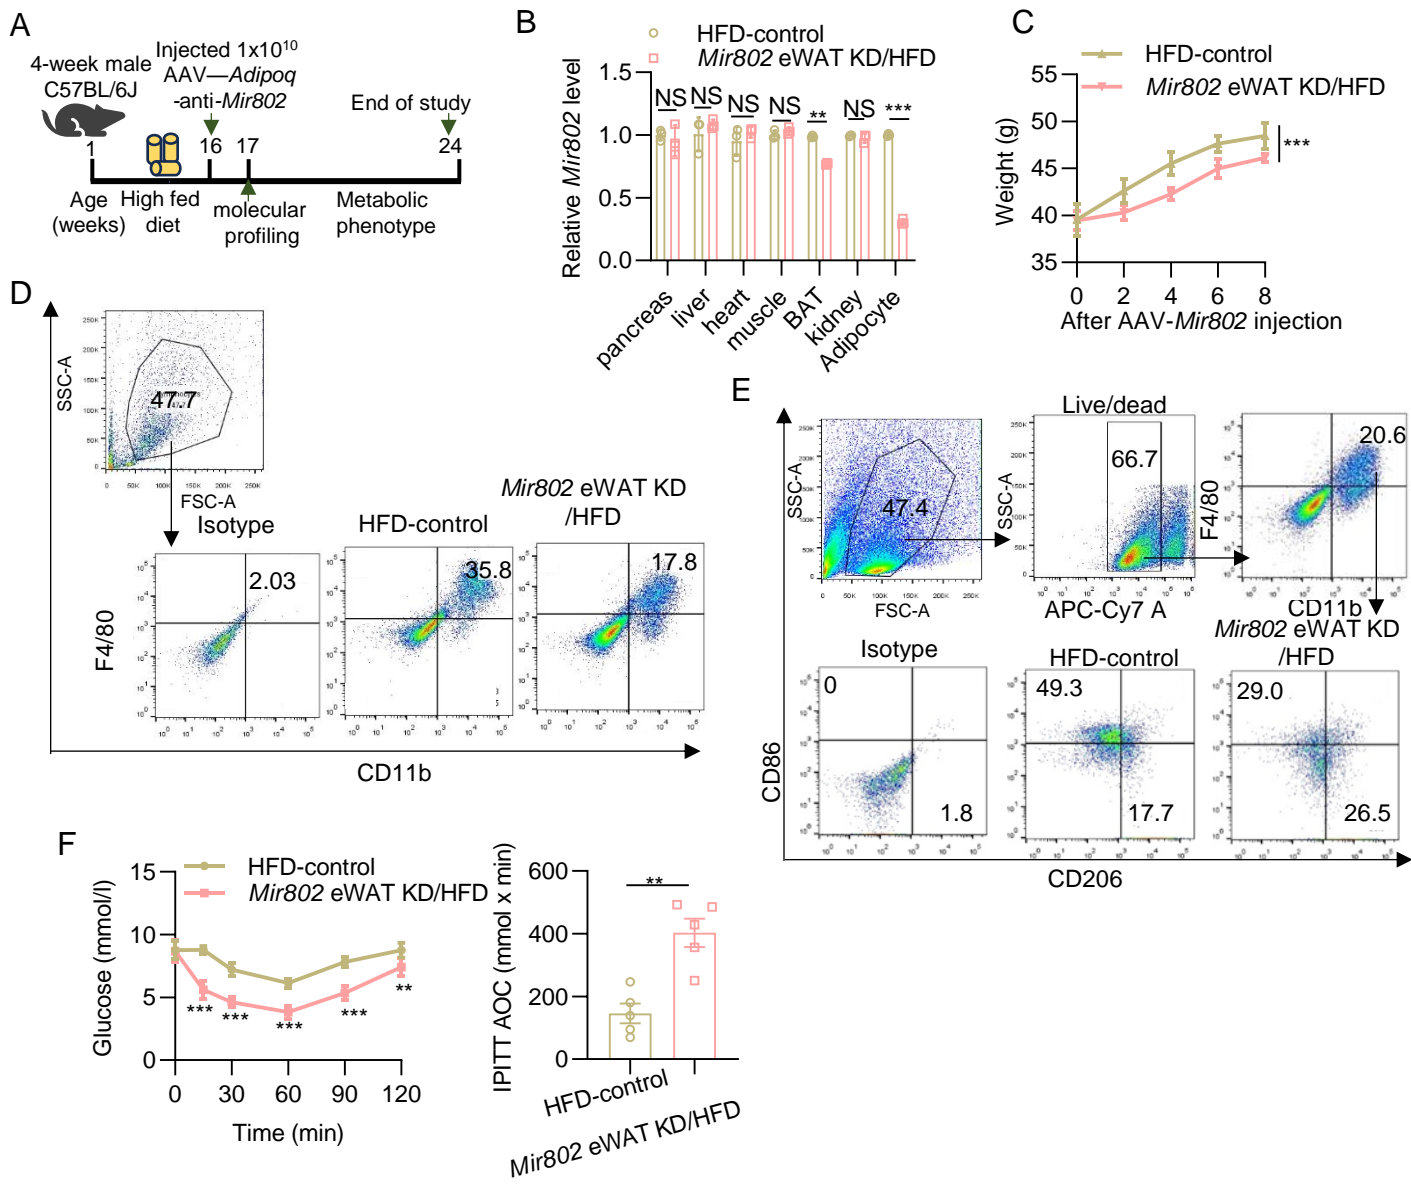

Supplement: supp [file elife-99162-supp-v1.zip]

Figure 2-figure supplement 2

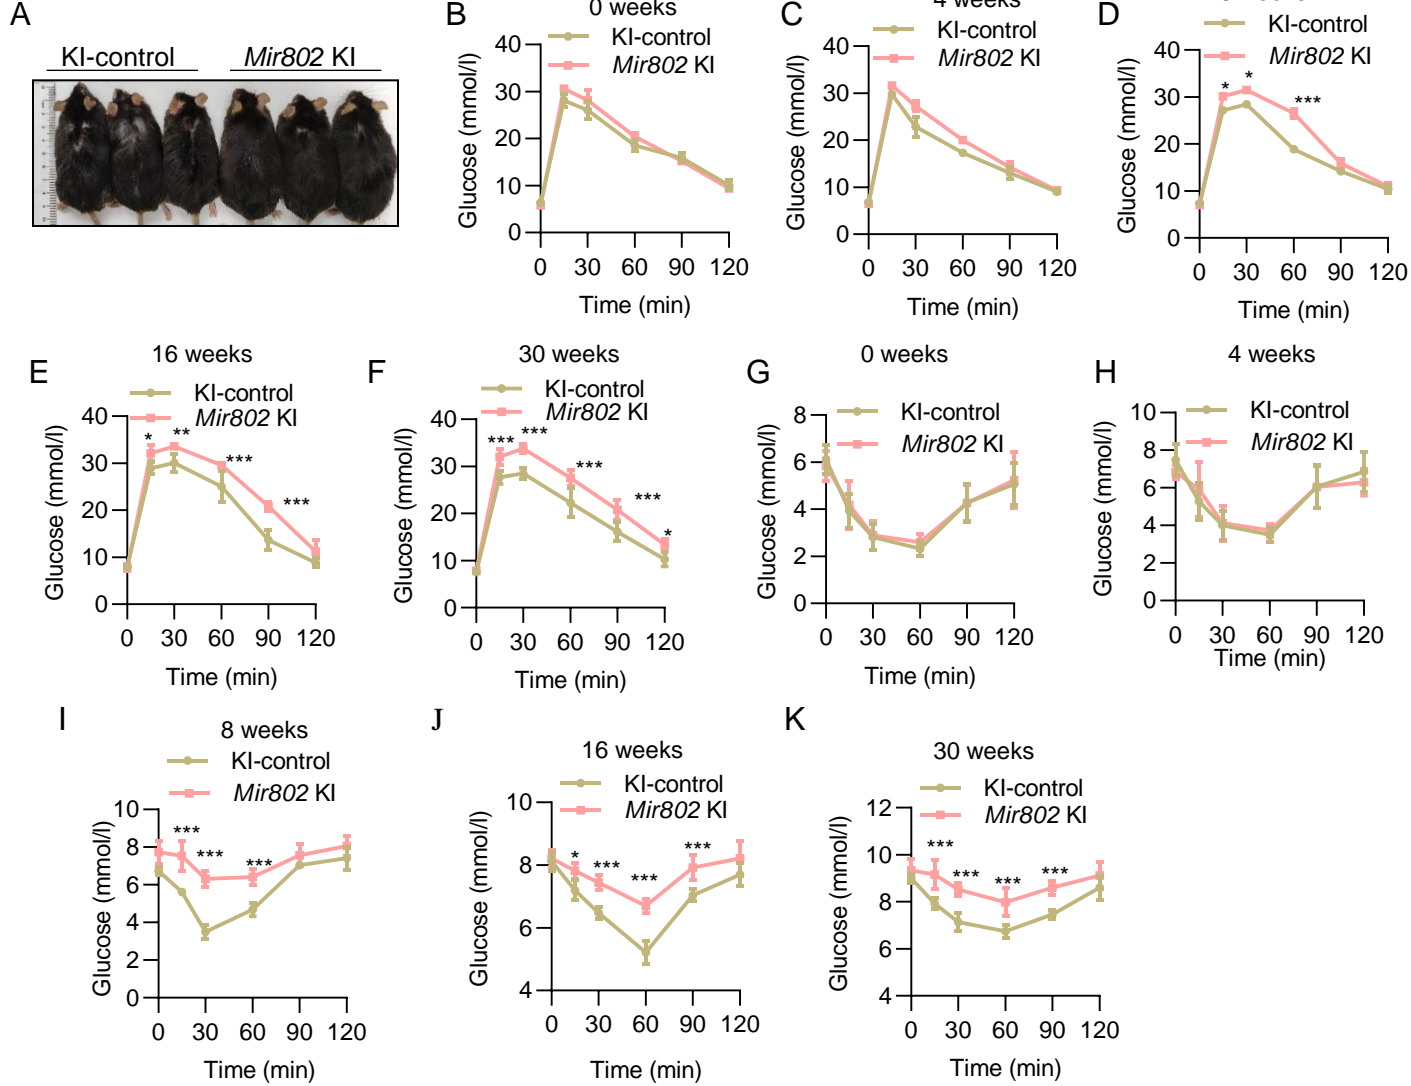

Supplement: supp [file elife-99162-supp-v1.zip]

Figure 1-figure supplement 1

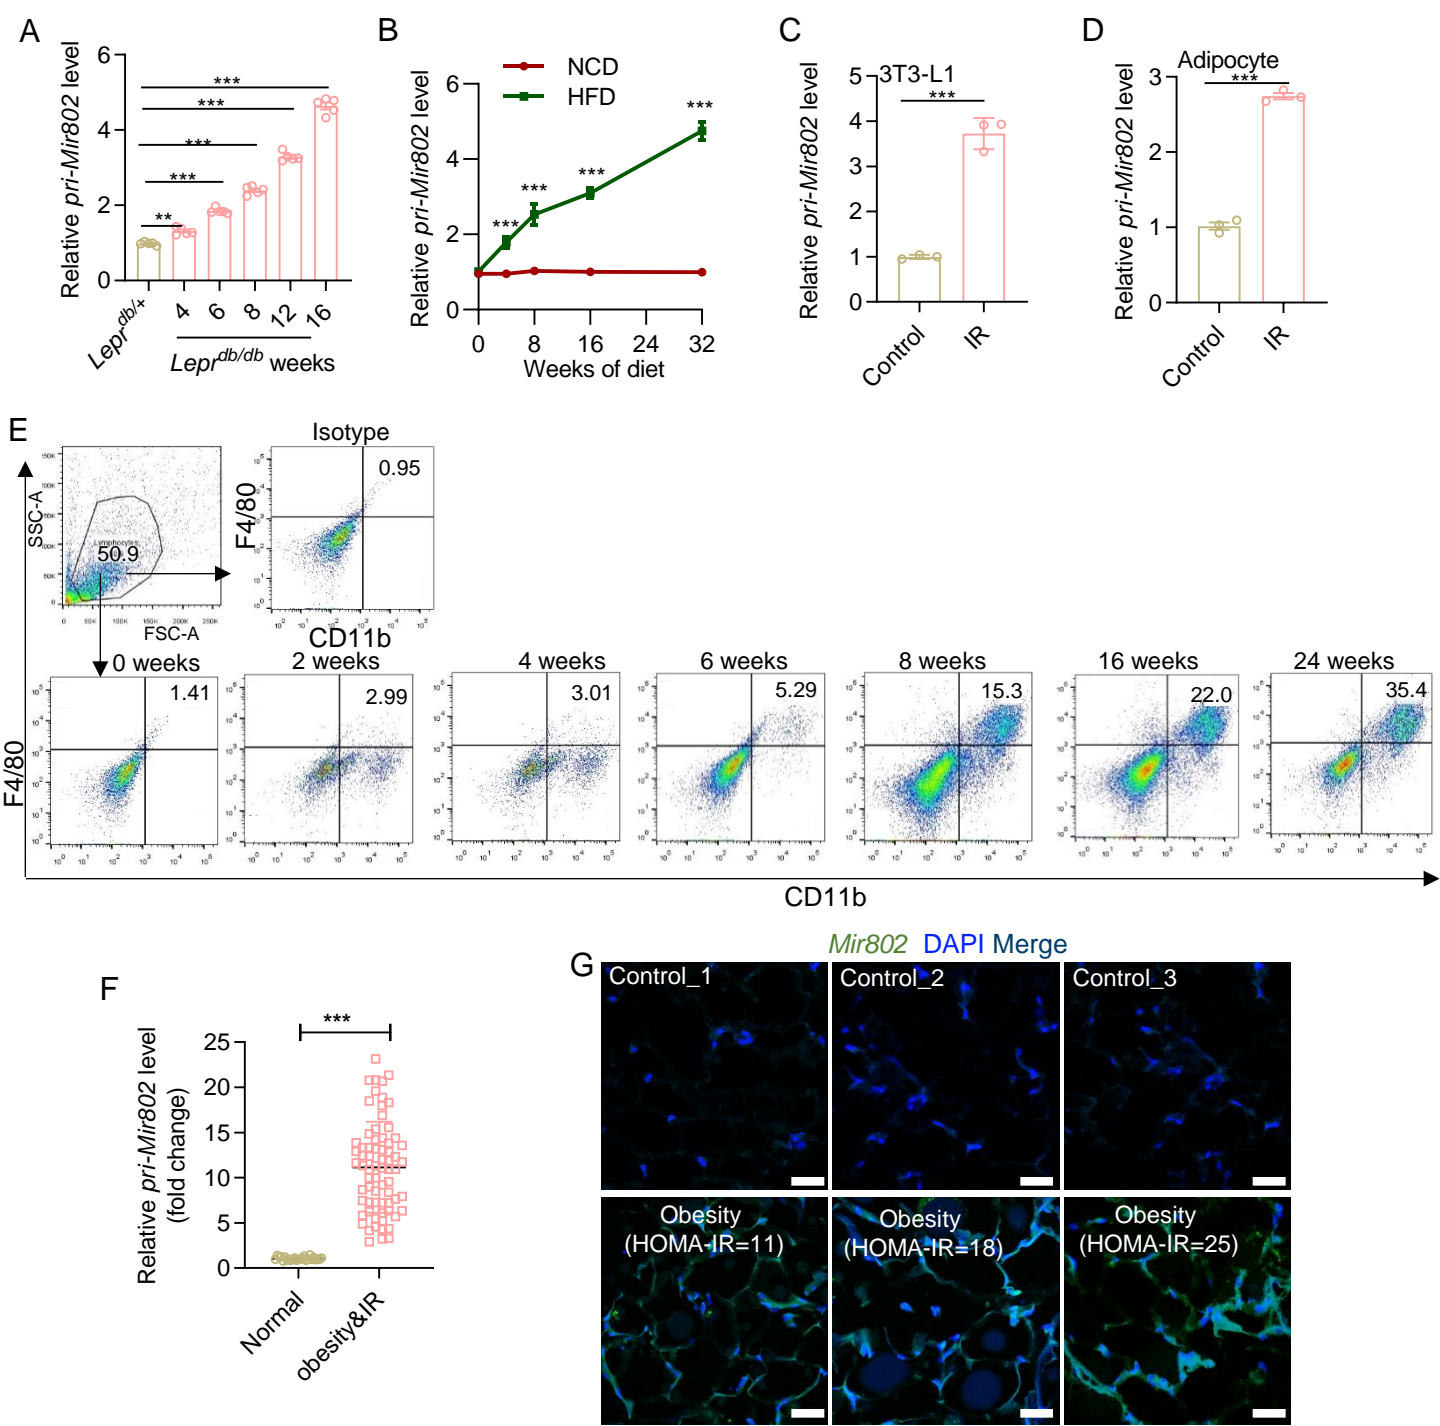

Supplement: supp [file elife-99162-supp-v1.zip]

Figure 6-figure supplement 1

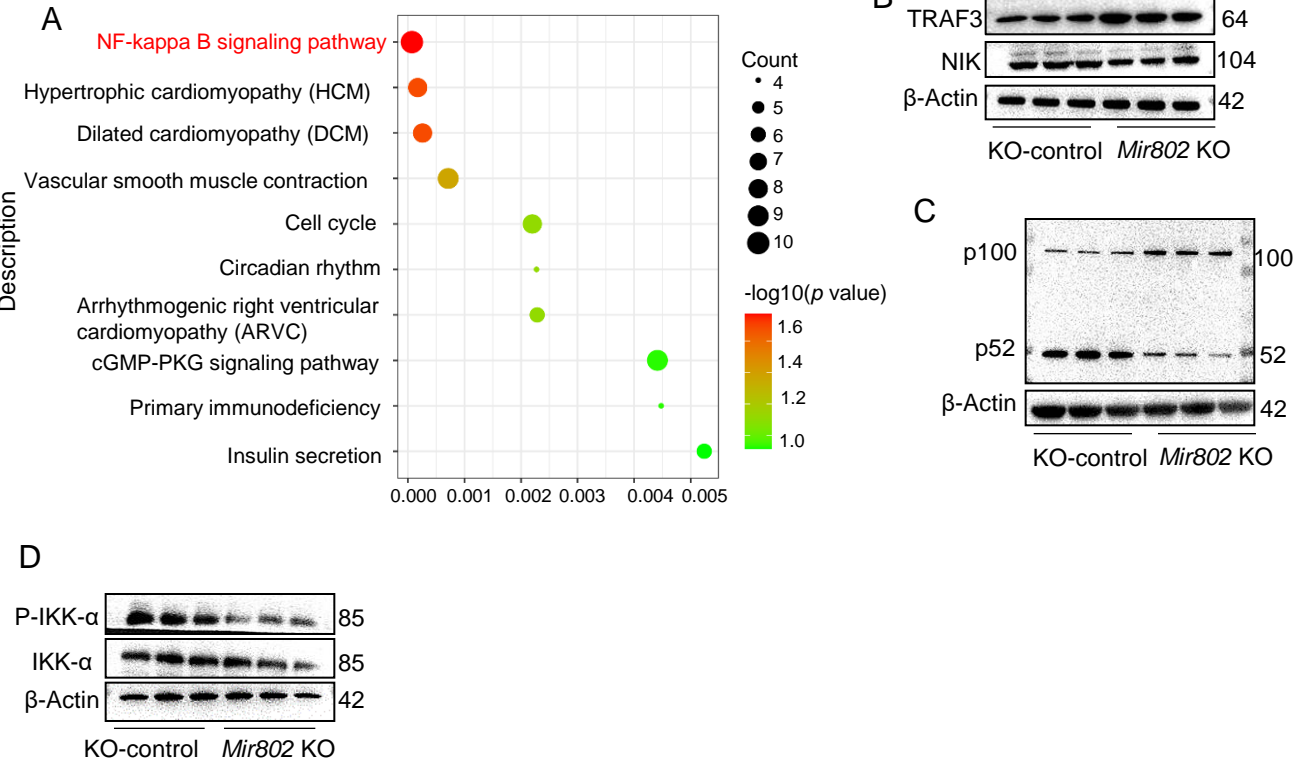

Supplement: supp [file elife-99162-supp-v1.zip]

Figure 2-figure supplement 1

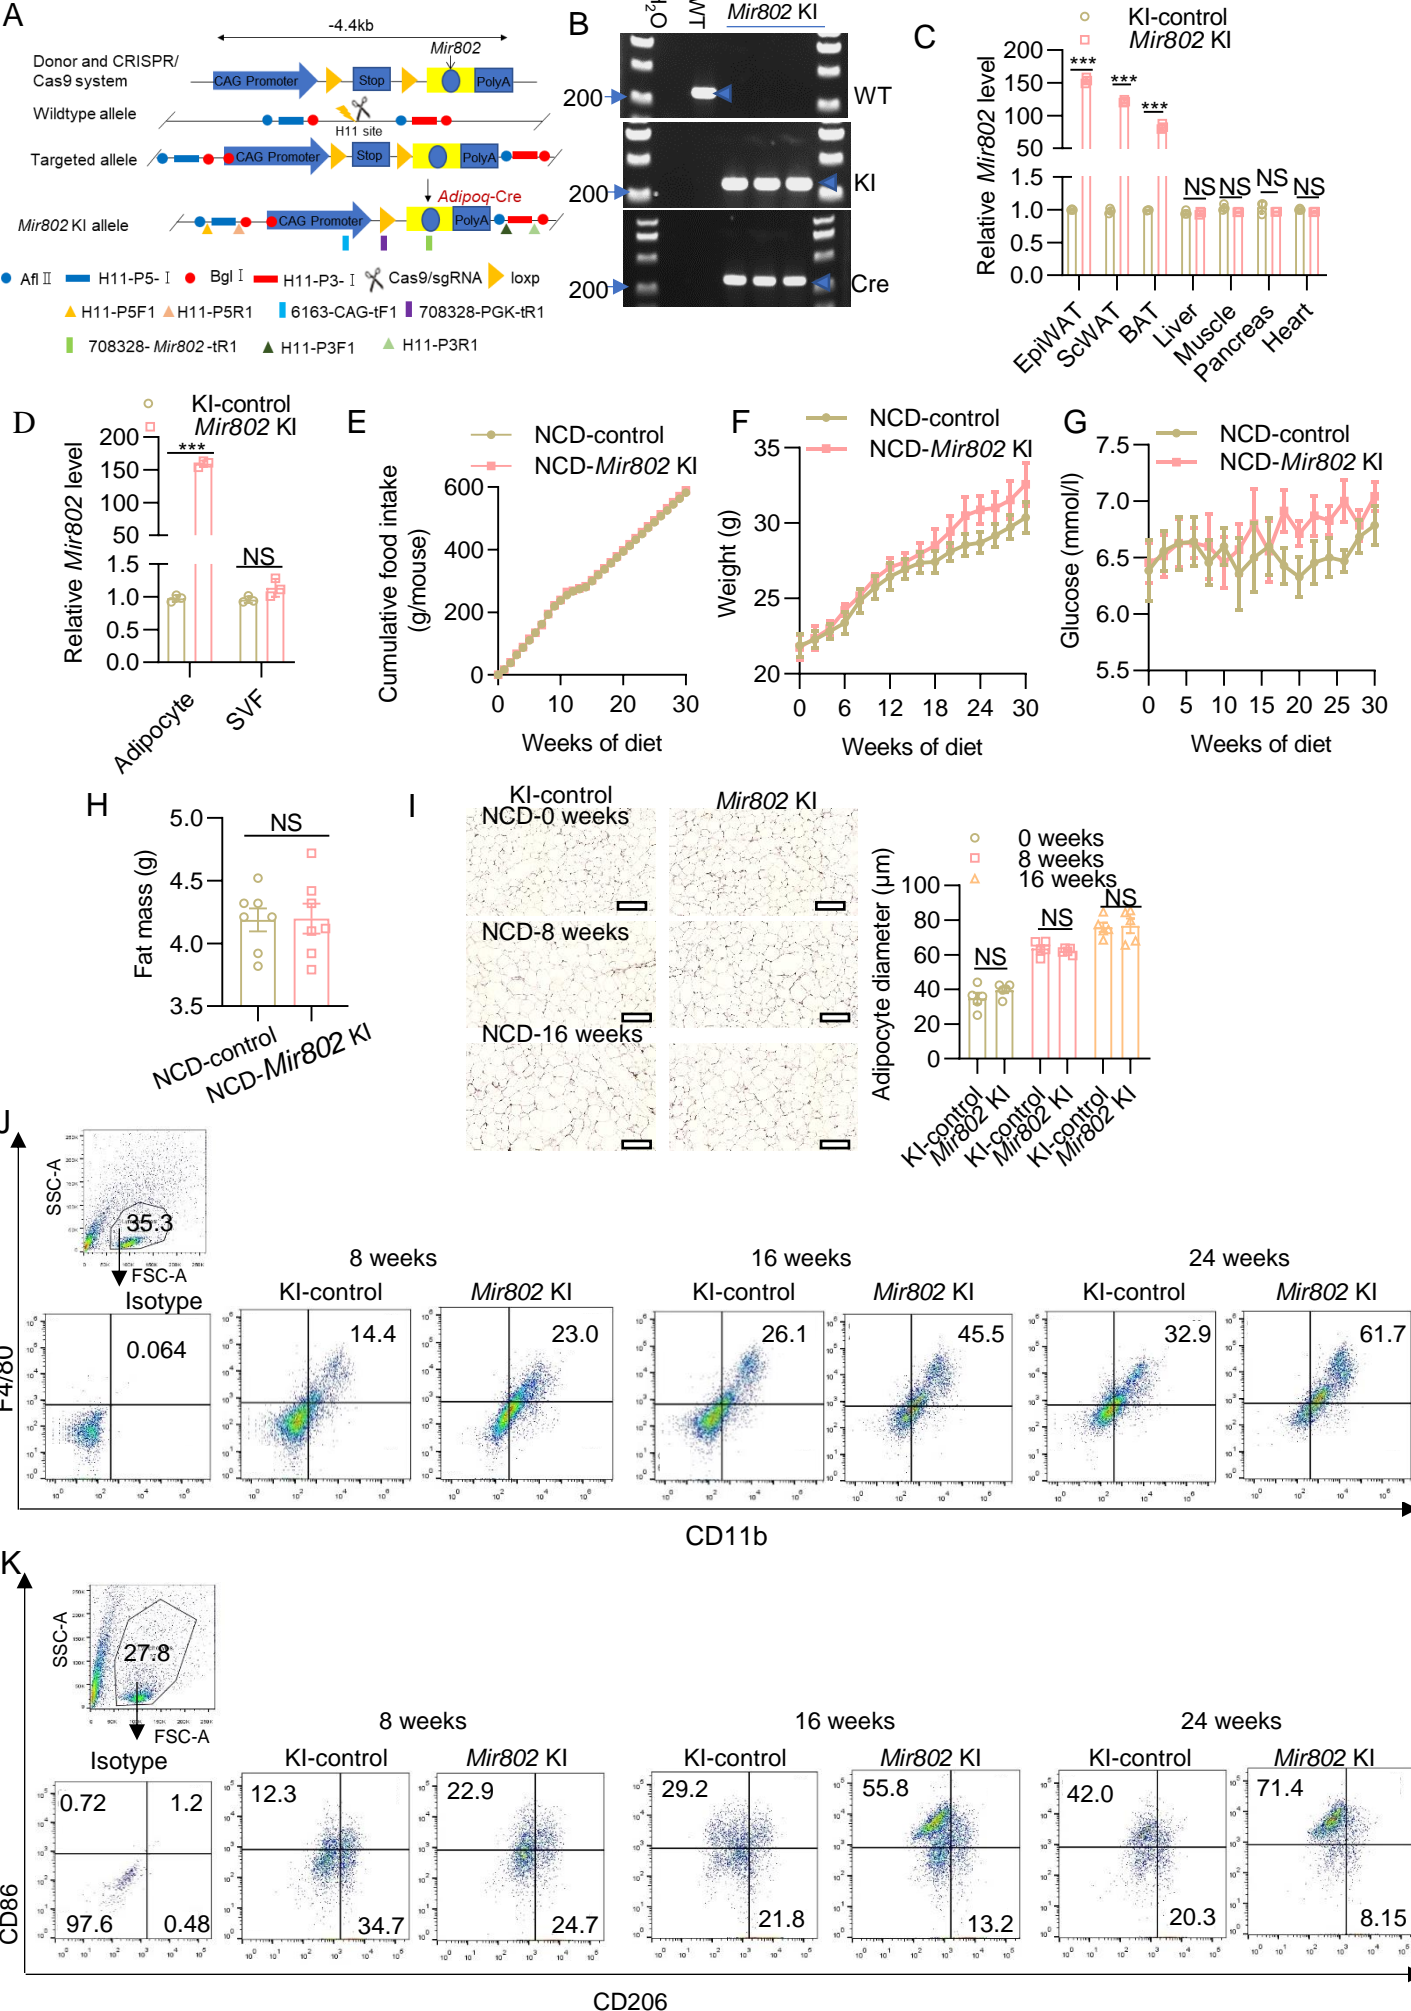

Supplement: supp [file elife-99162-supp-v1.zip]

Figure 4-figure supplement 2

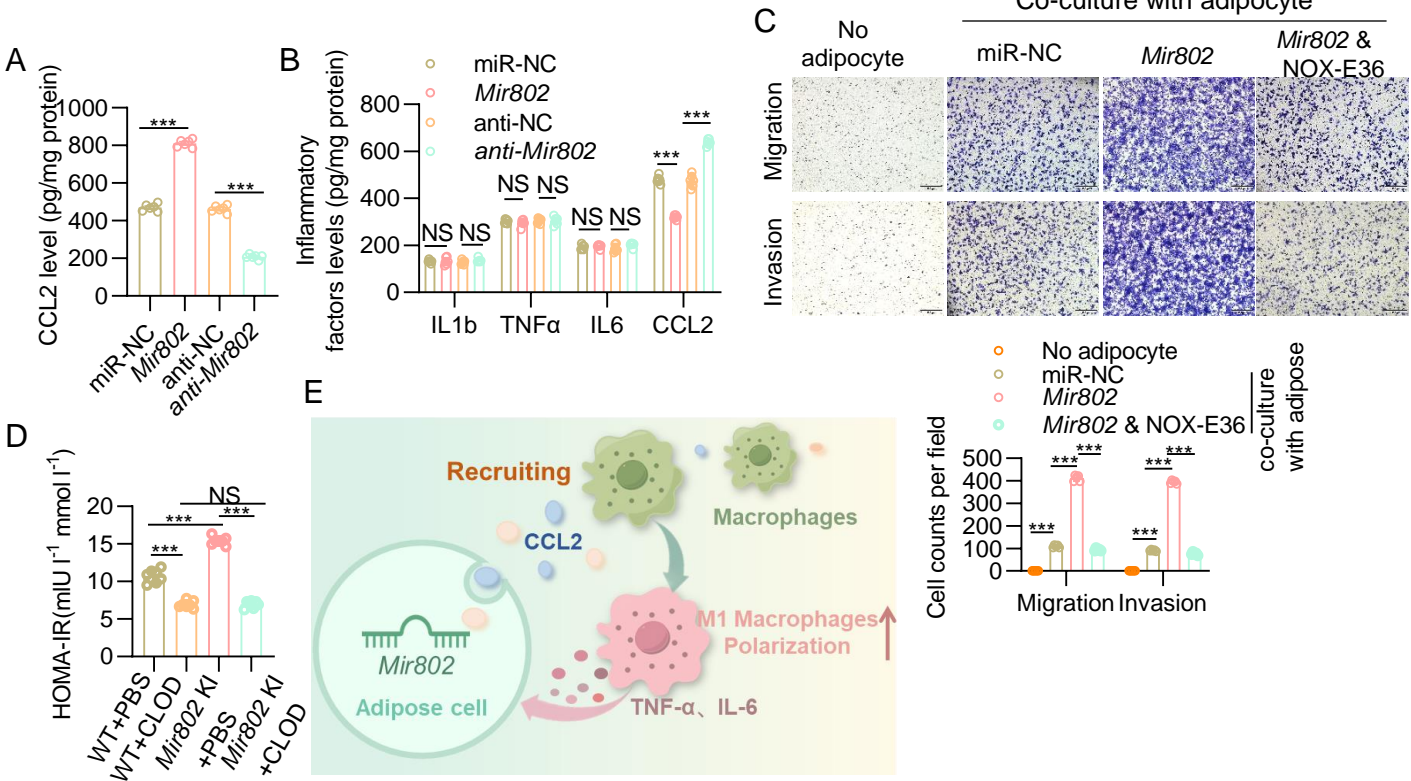

Supplement: supp [file elife-99162-supp-v1.zip]

Figure 4-figure supplement 1

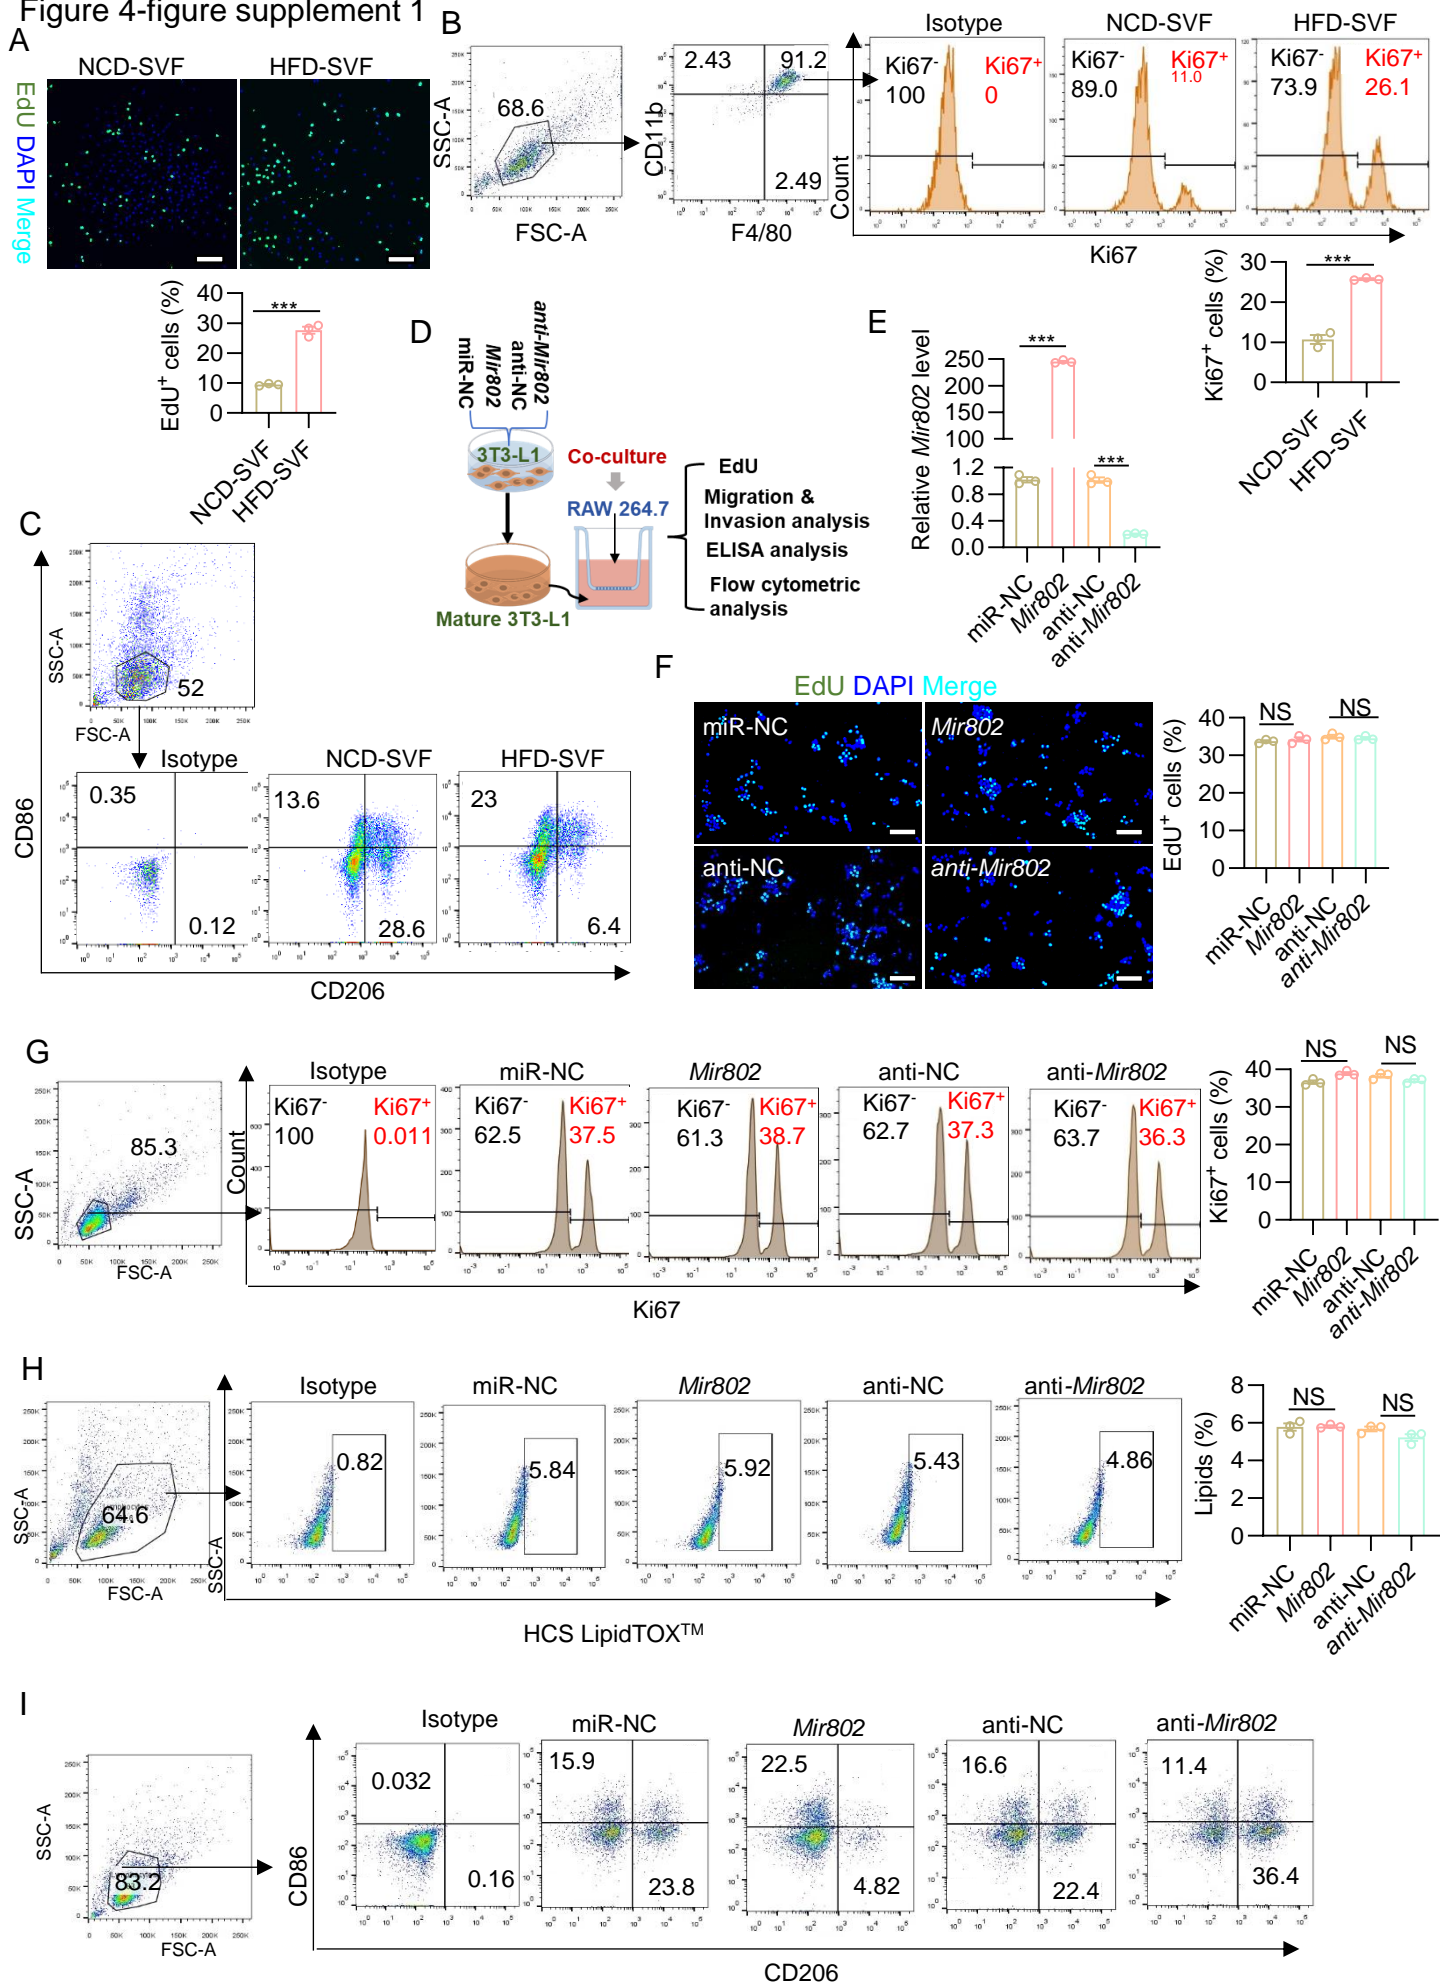

Supplement: supp [file elife-99162-supp-v1.zip]

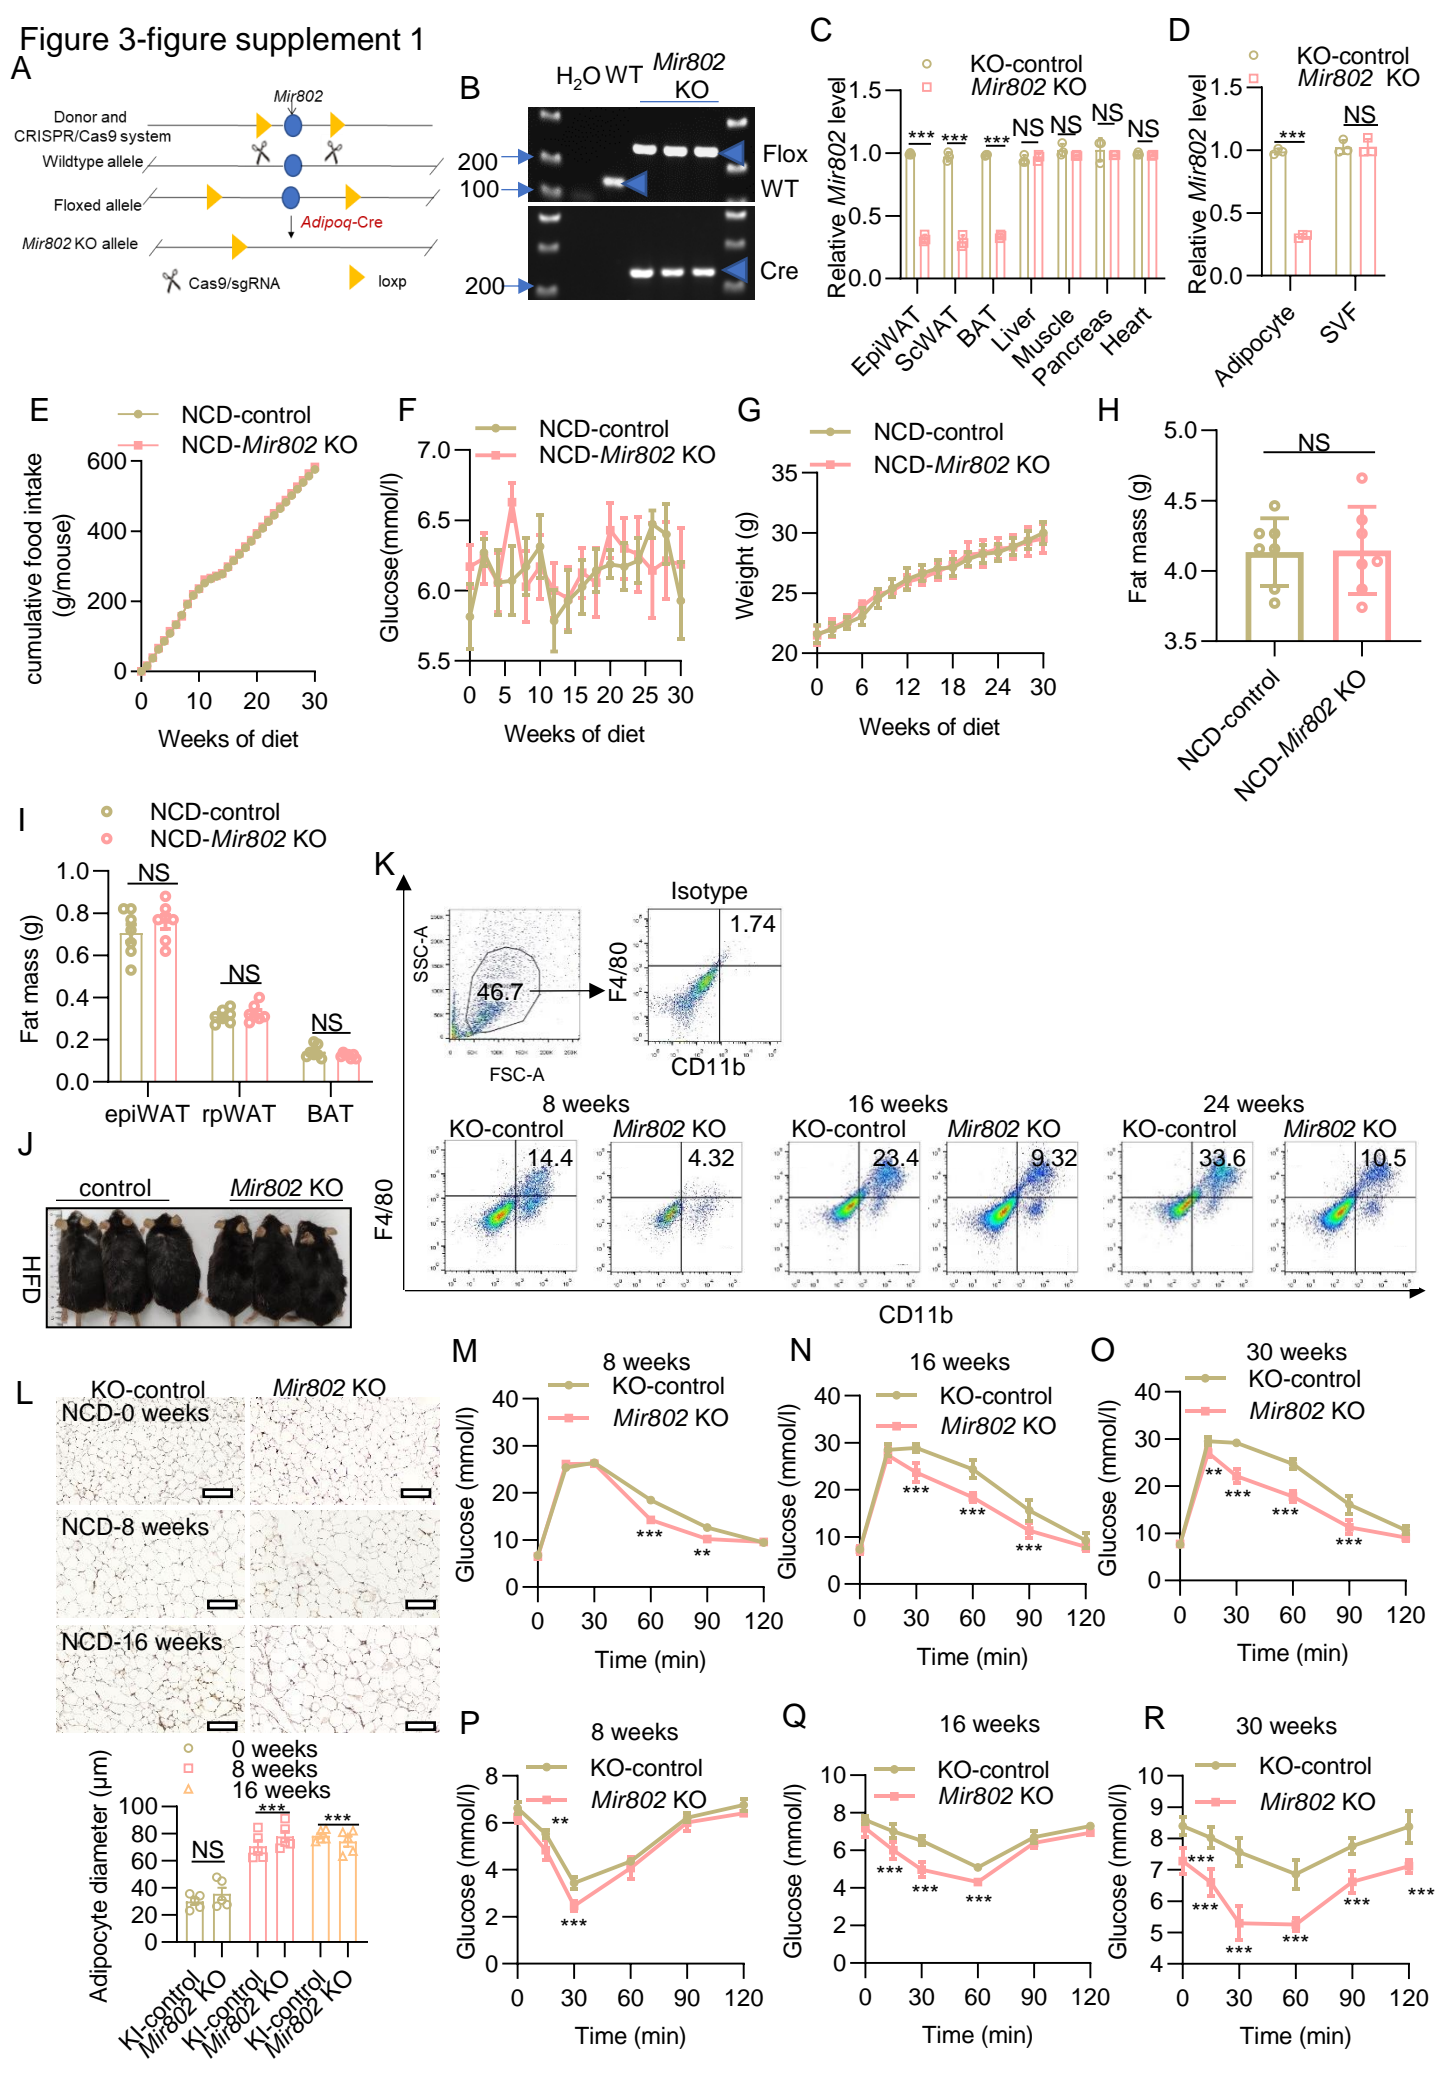

Supplement: supp [file elife-99162-supp-v1.zip]

Figure 7-figure supplement 1

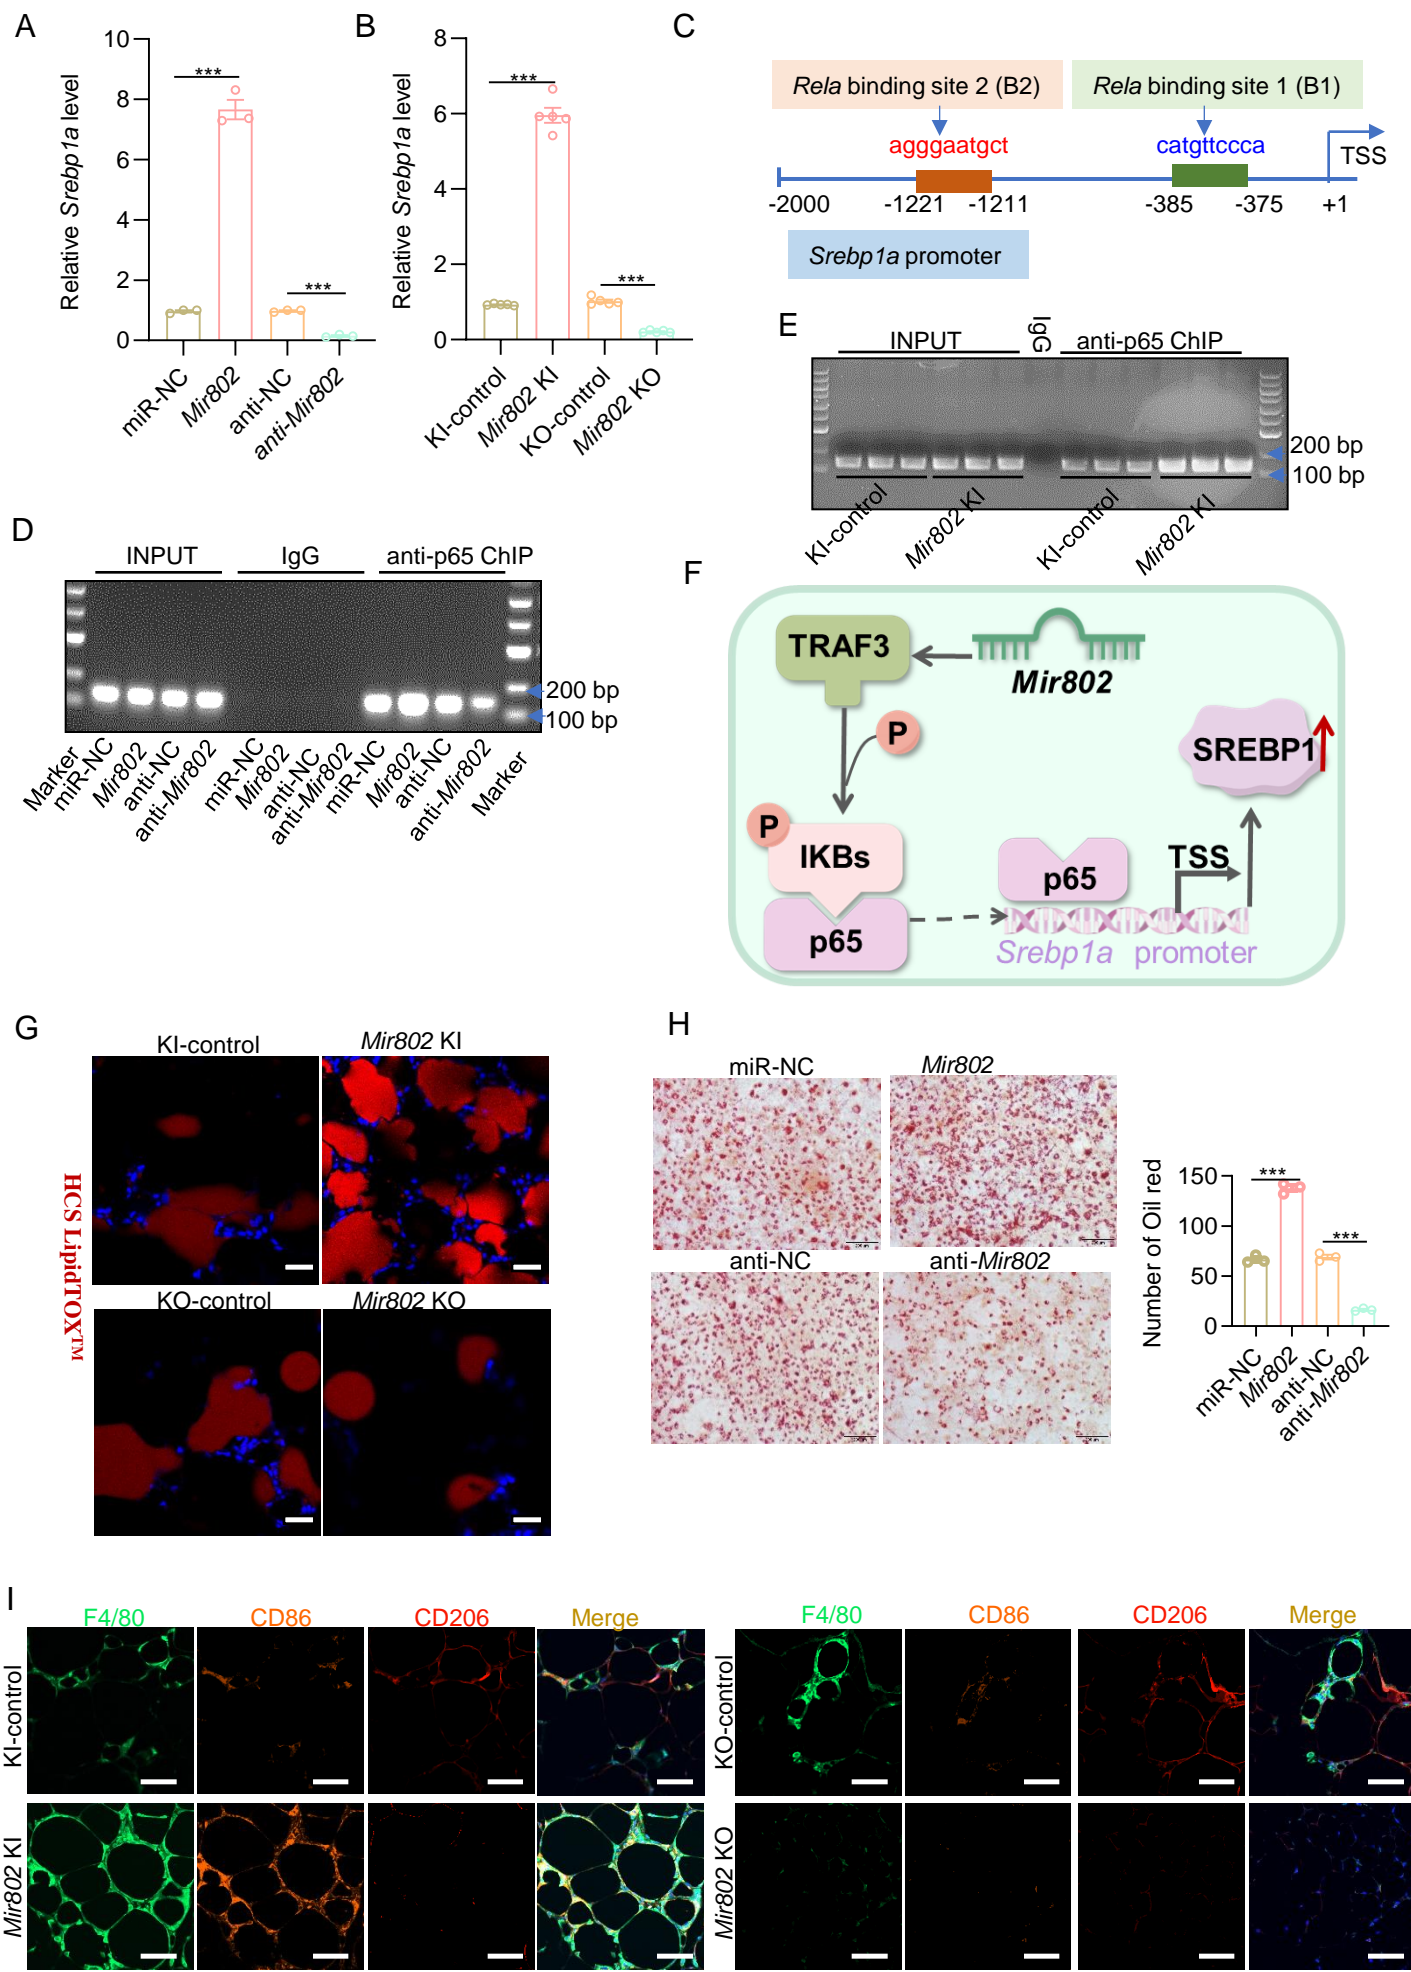

Supplement: supp [file elife-99162-supp-v1.zip]
